# Supplementary material for: Homeostatic interferon-lambda response to bacterial microbiota stimulates preemptive antiviral defense within discrete pockets of intestinal epithelium
Source: eLife. 2022 Feb 9;11:e74072. doi: 10.7554/eLife.74072 (PMC8853662; doi:10.7554/eLife.74072)
Supplement: Figure 1—figure supplement 1—source data 1. [file elife-74072-fig1-figsupp1-data1.xlsx]

## Sheet: Figure 1 - Figure Supplement 1A
Figure 1 - Figure Supplement 1A - Source Data
Description: Observed species (richness) of 16S sequences from stool of Ifnlr1+/+, Ifnlr1+/-, and Ifnlr1 -/- mice
Ifnlr1+/+	Ifnlr1+/-	Ifnlr1-/-
220	258	177
141	238	286
141	159	230
133	149	189
255	215	225
213	235	249
261	291	291
287	188	166
303	385	145
282	257	175
149	221	237
241		202
		225
		218
		283
Statistical Test
Tukey's multiple comparisons test	Mean Diff.	95.00% CI of diff.	Below threshold?	Summary	Adjusted P Value
Ifnlr1+/+ vs. Ifnlr1+/-	-17.17	-75.64 to 41.31	No	ns	0.7543
Ifnlr1+/+ vs. Ifnlr1-/-	-1.033	-55.29 to 53.22	No	ns	0.9988
Ifnlr1+/- vs. Ifnlr1-/-	16.13	-39.47 to 71.74	No	ns	0.7592

## Sheet: Figure 1 - Figure Supplement 1B
Figure 1 - Figure Supplement 1B - Source Data
Description: Shannon diversity index values of 16S sequences from stool of Ifnlr1+/+, Ifnlr1+/-, and Ifnlr1 -/- mice
Ifnlr1+/+	Ifnlr1+/-	Ifnlr1-/-
4.37772	4.1997	3.69203
3.45058	4.48028	4.57599
3.42522	3.61757	3.73028
3.31688	3.57188	3.33335
4.42385	3.88627	3.42961
3.73973	3.93498	3.59176
4.17693	4.30705	3.94925
4.66774	3.81927	3.70625
4.53026	4.77422	3.66663
4.16826	4.52858	3.76066
3.43457	4.47653	3.70319
4.26607		3.93726
		3.96792
		3.92522
		4.3786
Statistical Test
Tukey's multiple comparisons test	Mean Diff.	95.00% CI of diff.	Below threshold?	Summary	Adjusted P Value
Ifnlr1+/+ vs. Ifnlr1+/-	-0.147	-0.5611 to 0.2671	No	ns	0.6634
Ifnlr1+/+ vs. Ifnlr1-/-	0.175	-0.2092 to 0.5592	No	ns	0.5117
Ifnlr1+/- vs. Ifnlr1-/-	0.3219	-0.07186 to 0.7157	No	ns	0.127
