# Supplementary material for: Homeostatic interferon-lambda response to bacterial microbiota stimulates preemptive antiviral defense within discrete pockets of intestinal epithelium
Source: eLife. 2022 Feb 9;11:e74072. doi: 10.7554/eLife.74072 (PMC8853662; doi:10.7554/eLife.74072)
Supplement: Figure 1—figure supplement 2—source data 1. [file elife-74072-fig1-figsupp2-data1.xlsx]

## Sheet: Figure 1 - Figure Supplement 2
Figure 1 - Figure Supplement 2 - Source Data
Description: Results of GSEA for HALLMARK genes between each listed comparison
	IFNL vs WT			ABX vs WT			Ifnlr1 KO vs WT			Ifnlr1 KO + abx vs Ifnlr1 KO
NAME	NES	FDR q-val	FWER p-val	NES	FDR q-val	FWER p-val	NES	FDR q-val	FWER p-val	NES	FDR q-val	FWER p-val
HALLMARK_ALLOGRAFT_REJECTION	-1.69165	0.0244998	0.019	-2.61329	0	0	-1.76158	0.00353269	0.01	-2.08092	0	0
HALLMARK_MYOGENESIS	-1.41737	0.285578	0.347	-0.827219	1	1	-1.16545	0.470374	0.989	-1.05972	0.605542	0.999
HALLMARK_BILE_ACID_METABOLISM	-1.39455	0.239099	0.42	-1.00623	0.922105	1	0.778243	1	1	-0.854888	1	1
HALLMARK_TGF_BETA_SIGNALING	-1.32613	0.341746	0.642	-0.577697	1	1	0.597919	1	1	-1.06703	0.651966	0.999
HALLMARK_KRAS_SIGNALING_DN	-1.24171	0.549765	0.886	-1.40695	0.0747479	0.407	1.04618	1	0.999	-1.43002	0.0393933	0.312
HALLMARK_HYPOXIA	-1.16974	0.806284	0.978	-0.995606	0.914959	1	-0.860601	0.99871	1	-0.904034	1	1
HALLMARK_APICAL_JUNCTION	-1.16013	0.736298	0.982	0.773394	1	1	0.750906	1	1	-1.44744	0.0366383	0.271
HALLMARK_KRAS_SIGNALING_UP	-1.11905	0.856005	0.996	-1.22271	0.289475	0.931	-1.0651	0.610866	1	-1.80157	0.00124531	0.003
HALLMARK_TNFA_SIGNALING_VIA_NFKB	-1.09645	0.884774	0.997	-1.74611	0.0052439	0.02	-1.26636	0.277144	0.844	-1.63681	0.0106078	0.045
HALLMARK_PI3K_AKT_MTOR_SIGNALING	-1.09319	0.814529	0.999	-1.00836	0.972981	1	-0.683735	1	1	-0.532209	0.999885	1
HALLMARK_COAGULATION	-1.09047	0.753818	0.999	-0.858844	1	1	-1.25791	0.268971	0.87	0.741297	1	1
HALLMARK_ADIPOGENESIS	-1.06702	0.806964	1	0.522931	0.999859	1	-1.24826	0.264514	0.885	0.78555	1	1
HALLMARK_FATTY_ACID_METABOLISM	-1.00726	1	1	0.891661	1	1	-1.11285	0.543492	0.999	0.758073	1	1
HALLMARK_COMPLEMENT	-1.00452	0.998972	1	-1.43489	0.0638372	0.321	-0.830029	1	1	-1.06192	0.633213	0.999
HALLMARK_XENOBIOTIC_METABOLISM	-0.998182	0.963403	1	-0.82338	1	1	-0.918809	0.869806	1	-0.766211	1	1
HALLMARK_IL6_JAK_STAT3_SIGNALING	-0.97989	0.99086	1	-1.58616	0.0176821	0.08	-1.05495	0.614632	1	-1.55233	0.0174948	0.098
HALLMARK_PEROXISOME	-0.976852	0.947652	1	1.10316	0.756928	0.995	0.829833	1	1	-0.763146	1	1
HALLMARK_P53_PATHWAY	-0.973746	0.908506	1	-0.860334	1	1	-0.976026	0.753412	1	-0.850808	1	1
HALLMARK_ESTROGEN_RESPONSE_LATE	-0.901364	1	1	-0.768162	1	1	-1.04762	0.611528	1	-0.713867	1	1
HALLMARK_APICAL_SURFACE	-0.892198	1	1	-1.35228	0.110522	0.579	-0.810819	1	1	-1.74221	0.00449109	0.014
HALLMARK_SPERMATOGENESIS	-0.889505	1	1	0.717435	1	1	-0.994602	0.748245	1	0.937383	1	1
HALLMARK_IL2_STAT5_SIGNALING	-0.885254	1	1	-1.58323	0.0151561	0.08	-1.1603	0.450078	0.993	-0.987638	0.877212	1
HALLMARK_ANDROGEN_RESPONSE	-0.874301	1	1	1.18365	0.524223	0.96	1.0274	1	1	-0.828397	1	1
HALLMARK_APOPTOSIS	-0.871976	1	1	-1.04363	0.856458	1	-0.666708	0.993998	1	-1.55775	0.0187782	0.091
HALLMARK_WNT_BETA_CATENIN_SIGNALING	-0.831657	1	1	-1.23579	0.282122	0.912	0.878568	1	1	-1.49425	0.0285659	0.179
HALLMARK_REACTIVE_OXYGEN_SPECIES_PATHWAY	-0.826345	1	1	-0.771053	1	1	-0.998787	0.768284	1	-0.949226	0.916964	1
HALLMARK_PROTEIN_SECRETION	-0.815221	1	1	-0.415023	1	1	0.484131	1	1	-0.901367	1	1
HALLMARK_ESTROGEN_RESPONSE_EARLY	-0.787985	1	1	-0.761329	1	1	-0.679755	1	1	0.761866	1	1
HALLMARK_UV_RESPONSE_DN	-0.777569	1	1	0.914124	1	1	-0.768496	1	1	-0.808258	1	1
HALLMARK_GLYCOLYSIS	-0.719868	1	1	-0.712685	1	1	-0.935948	0.839415	1	0.637286	1	1
HALLMARK_HEME_METABOLISM	-0.70338	1	1	0.78176	1	1	0.629096	1	1	0.690373	1	1
HALLMARK_UNFOLDED_PROTEIN_RESPONSE	-0.518199	0.999726	1	-0.545541	1	1	-0.896374	0.916138	1	0.602905	0.998597	1
HALLMARK_OXIDATIVE_PHOSPHORYLATION	0.362275	1	1	0.672608	1	1	-0.948511	0.82468	1	-0.573935	1	1
HALLMARK_NOTCH_SIGNALING	0.527986	1	1	-1.12152	0.571936	0.997	-0.742149	1	1	-0.817988	1	1
HALLMARK_DNA_REPAIR	0.605532	1	1	-0.6497	1	1	-1.13026	0.515681	0.999	-0.573897	1	1
HALLMARK_MTORC1_SIGNALING	0.650425	1	1	0.609812	1	1	-1.0875	0.564942	1	1.04044	0.746884	1
HALLMARK_MITOTIC_SPINDLE	0.741133	1	1	-0.636662	1	1	-1.54622	0.0230466	0.11	1.18269	0.396541	0.957
HALLMARK_UV_RESPONSE_UP	0.745799	1	1	-0.911841	1	1	-0.986414	0.747084	1	-1.06889	0.687653	0.999
HALLMARK_CHOLESTEROL_HOMEOSTASIS	0.797987	1	1	1.43276	0.25376	0.313	0.957765	1	1	1.0487	0.830107	1
HALLMARK_EPITHELIAL_MESENCHYMAL_TRANSITION	0.805203	1	1	1.28222	0.474019	0.744	0.780164	1	1	-0.960708	0.954745	1
HALLMARK_INFLAMMATORY_RESPONSE	0.898501	1	1	-1.78685	0.00289028	0.009	-1.10488	0.537699	1	-1.64965	0.0116273	0.041
HALLMARK_HEDGEHOG_SIGNALING	1.04893	0.678933	1	-0.842322	1	1	1.29155	0.243923	0.713	-1.28456	0.140145	0.776
HALLMARK_ANGIOGENESIS	1.12452	0.480391	0.995	1.21031	0.566282	0.922	1.33458	0.243242	0.567	-0.954714	0.935153	1
HALLMARK_MYC_TARGETS_V1	1.19709	0.325652	0.963	0.748664	1	1	-1.604	0.0118014	0.051	1.29465	0.189085	0.691
HALLMARK_G2M_CHECKPOINT	1.25042	0.24869	0.889	-0.928632	1	1	-1.93249	0	0	1.62643	0.0303938	0.049
HALLMARK_MYC_TARGETS_V2	1.28493	0.221705	0.806	0.988795	1	1	-1.40213	0.0903255	0.411	1.38848	0.158787	0.402
HALLMARK_E2F_TARGETS	1.33512	0.180265	0.65	-0.678008	1	1	-1.7242	0.00529132	0.019	1.38214	0.113059	0.427
HALLMARK_PANCREAS_BETA_CELLS	1.3549	0.206779	0.598	0.86307	1	1	1.47059	0.138856	0.212	-1.49308	0.0262354	0.183
HALLMARK_INTERFERON_GAMMA_RESPONSE	2.37799	0	0	-2.53146	0	0	-2.19729	0	0	-1.83343	0.00126452	0.002
HALLMARK_INTERFERON_ALPHA_RESPONSE	2.80376	0	0	-2.30205	0	0	-2.08596	0	0	-1.30239	0.12847	0.724
