# Supplementary material for: Homeostatic interferon-lambda response to bacterial microbiota stimulates preemptive antiviral defense within discrete pockets of intestinal epithelium
Source: eLife. 2022 Feb 9;11:e74072. doi: 10.7554/eLife.74072 (PMC8853662; doi:10.7554/eLife.74072)
Supplement: Figure 1—figure supplement 3—source data 1. [file elife-74072-fig1-figsupp3-data1.xlsx]

## Sheet: Figure 1 - Figure Supplement 3
Figure 1 - Figure Supplement 3 - Source Data
Description: Log10 estimated 16S gene copies from stool of H2O and ABX-treated mice
H2O	ABX
5.52777	-0.36633
3.63666	-0.33696
5.47865	-0.583482
5.40805	-0.692715
4.90984	-0.7305
5.45687	-0.419047
4.97968	-0.439727
	-0.51858
Statistical Test
Mann Whitney test
P value	0.0003
Exact or approximate P value?	Exact
P value summary	***
Significantly different (P < 0.05)?	Yes
One- or two-tailed P value?	Two-tailed
Sum of ranks in column A,B	84 , 36
Mann-Whitney U	0
