# Supplementary material for: Homeostatic interferon-lambda response to bacterial microbiota stimulates preemptive antiviral defense within discrete pockets of intestinal epithelium
Source: eLife. 2022 Feb 9;11:e74072. doi: 10.7554/eLife.74072 (PMC8853662; doi:10.7554/eLife.74072)
Supplement: Figure 1—source data 1. [file elife-74072-fig1-data1.xlsx]

## Sheet: Figure 1B
Figure 1B - Source Data
Description: GSEA results for enrichment of HALLMARK_INTERFERON_ALPHA_RESPONSE genes in interferon lambda-treated WT mice relative to untreated WT mice
SYMBOL	RANK IN GENE LIST	RANK METRIC SCORE	RUNNING ES	CORE ENRICHMENT
Bst2	20	2.54294	0.0459155	Yes
Ifit2	22	2.39609	0.0899461	Yes
Oas1b	29	2.20028	0.13016	Yes
Ifi44	30	2.12466	0.169241	Yes
Usp18	32	2.09599	0.207751	Yes
Ifit3	40	1.91049	0.242592	Yes
Plscr2	43	1.89045	0.277279	Yes
Mx2	65	1.61762	0.306131	Yes
Isg15	66	1.6176	0.335885	Yes
Dhx58	70	1.55829	0.36442	Yes
Mx1	75	1.522	0.392243	Yes
Herc6	76	1.51724	0.420151	Yes
Trim30a	94	1.35208	0.444291	Yes
Rtp4	108	1.28921	0.467446	Yes
Oas1g	131	1.20928	0.488745	Yes
Oas1a	142	1.1825	0.510066	Yes
Ddx60	185	1.09326	0.528371	Yes
Rsad2	188	1.08935	0.548323	Yes
Sp110	205	1.07208	0.567355	Yes
Cmpk2	230	1.04205	0.585491	Yes
Oas1c	231	1.04113	0.604642	Yes
Oasl1	320	0.930994	0.617986	Yes
Ube2l6	335	0.912032	0.634161	Yes
Irf7	350	0.886955	0.649874	Yes
Ly6e	465	0.796956	0.659636	Yes
Rnf31	514	0.761696	0.671585	Yes
Psmb9	532	0.749504	0.684641	Yes
Pnpt1	607	0.724105	0.694781	Yes
H2-T24	627	0.712396	0.707069	Yes
Lgals3bp	757	0.658161	0.713633	Yes
Helz2	771	0.655155	0.725126	Yes
Ifih1	777	0.654157	0.736943	Yes
Samd9l	783	0.652452	0.74873	Yes
Adar	886	0.620024	0.755753	Yes
Trim21	920	0.608929	0.765536	Yes
Parp12	1116	0.558469	0.767432	Yes
Isg20	1146	0.552087	0.776341	Yes
Eif2ak2	1285	0.525546	0.78008	Yes
Ifitm3	1336	0.520764	0.787511	Yes
Cxcl10	1374	0.517178	0.795434	Yes
Epsti1	1536	0.498768	0.797693	Yes
Trim14	1600	0.491644	0.804029	Yes
Irf9	1686	0.477762	0.809166	Yes
Ifi35	1725	0.471324	0.816203	Yes
Uba7	1746	0.467118	0.823936	Yes
Tap1	2209	0.41246	0.811677	No
Cxcl11	2341	0.403553	0.813472	No
Parp14	2442	0.391836	0.816384	No
Psmb8	2608	0.375592	0.816205	No
Gbp2	3843	0.271408	0.768188	No
Psme2b	3928	0.263839	0.769432	No
Trim25	4116	0.247294	0.765948	No
1700057G04Rik	4164	0.243094	0.768401	No
Oas1h	4343	0.228372	0.764955	No
Tdrd7	4838	0.202701	0.747463	No
B2m	4977	0.192819	0.745081	No
Parp9	5053	0.18762	0.74531	No
Trim26	5163	0.184523	0.744022	No
Wars	5364	0.172794	0.738609	No
Nmi	5625	0.158047	0.730347	No
Psme2	5688	0.154876	0.730533	No
Plscr1	7152	0.0914151	0.669368	No
Psme1	8777	0.0389155	0.600321	No
H2-M9	10098	0.00121249	0.54364	No
H2-M10.3	11031	0	0.503604	No
Ifitm7	11292	0	0.492435	No
Casp1	12752	-0.0117684	0.429977	No
Ifitm2	13369	-0.0289169	0.404047	No
Irf1	14264	-0.0546501	0.366649	No
Gbp2b	16913	-0.147944	0.25562	No
Ifitm1	16945	-0.149304	0.257034	No
Gm11127	19254	-0.266062	0.162783	No
Oas1e	20147	-0.339507	0.13071	No
Gm7030	20601	-0.376469	0.118175	No

## Sheet: Figure 1C
Figure 1C - Source Data
Description: GSEA results for depletion of HALLMARK_INTERFERON_ALPHA_RESPONSE genes in ABX-treated WT mice relative to WT mice
SYMBOL	RANK IN GENE LIST	RANK METRIC SCORE	RUNNING ES	CORE ENRICHMENT
Plscr2	224	0.979962	0.0225967	No
1700057G04Rik	1250	0.540137	-0.00367589	No
Plscr1	3540	0.302291	-0.0920662	No
Cxcl11	5472	0.189826	-0.168775	No
Trim14	6147	0.157069	-0.192564	No
Samd9l	7223	0.110588	-0.235107	No
Pnpt1	7862	0.093601	-0.259437	No
Eif2ak2	7977	0.090109	-0.261371	No
Trim26	8106	0.0862248	-0.264035	No
Ifitm1	9159	0.0508316	-0.307555	No
Wars	9860	0.0284679	-0.336689	No
H2-T24	10676	0.00553379	-0.371517	No
Oas1e	11388	0	-0.402059	No
Oas1h	11390	0	-0.402102	No
Cmpk2	13846	-0.0301393	-0.506571	No
Ifitm3	14086	-0.0371867	-0.515615	No
Casp1	15216	-0.0741654	-0.561676	No
Mx2	15882	-0.0964517	-0.587071	No
Ifih1	16053	-0.10238	-0.591008	No
Nmi	16283	-0.110756	-0.597203	No
Oasl1	16712	-0.128264	-0.611372	No
Trim25	16966	-0.139686	-0.617648	No
Epsti1	17409	-0.160686	-0.631352	No
Tdrd7	17429	-0.161619	-0.626854	No
Ifitm2	17751	-0.170558	-0.635036	No
Irf9	17853	-0.174697	-0.633631	No
Gm11127	18172	-0.192447	-0.640964	No
Adar	18355	-0.203547	-0.64209	No
Psme1	18485	-0.211358	-0.640683	No
Ifitm7	19094	-0.244049	-0.658777	Yes
Oas1b	19148	-0.247846	-0.652905	Yes
B2m	19160	-0.248656	-0.645202	Yes
Psme2	19410	-0.267577	-0.647101	Yes
Gbp2	19490	-0.274061	-0.641484	Yes
Parp14	19503	-0.274927	-0.632961	Yes
Rnf31	19574	-0.281877	-0.6267	Yes
Parp12	19620	-0.283701	-0.619306	Yes
Gm7030	19819	-0.298174	-0.618008	Yes
Psme2b	19823	-0.298486	-0.608323	Yes
Lgals3bp	19944	-0.310546	-0.603268	Yes
Gbp2b	20061	-0.323009	-0.597631	Yes
Parp9	20188	-0.33545	-0.592015	Yes
Irf1	20315	-0.352556	-0.585836	Yes
Isg20	20392	-0.358426	-0.577316	Yes
H2-M10.3	20560	-0.374285	-0.572185	Yes
Oas1g	20588	-0.377843	-0.560922	Yes
Irf7	20676	-0.385409	-0.551988	Yes
Ifit2	20854	-0.402492	-0.546358	Yes
Oas1c	20863	-0.402995	-0.533452	Yes
Trim21	21089	-0.421958	-0.529244	Yes
Oas1a	21283	-0.436875	-0.523172	Yes
Ifit3	21341	-0.441274	-0.511112	Yes
Ifi35	21538	-0.454496	-0.504589	Yes
Ifi44	21737	-0.483018	-0.497213	Yes
Mx1	21760	-0.48575	-0.482188	Yes
Trim30a	21922	-0.508576	-0.472383	Yes
H2-M9	21944	-0.512213	-0.456445	Yes
Herc6	22080	-0.536219	-0.444614	Yes
Rsad2	22100	-0.539162	-0.427704	Yes
Ddx60	22294	-0.589624	-0.416609	Yes
Uba7	22442	-0.633334	-0.402101	Yes
Ly6e	22448	-0.6353	-0.381429	Yes
Ube2l6	22538	-0.671871	-0.363162	Yes
Cxcl10	22881	-0.821301	-0.350851	Yes
Bst2	22976	-0.881372	-0.325911	Yes
Helz2	23004	-0.906215	-0.297277	Yes
Sp110	23064	-0.965834	-0.268056	Yes
Usp18	23066	-0.966414	-0.236326	Yes
Psmb8	23079	-0.976117	-0.204749	Yes
Rtp4	23092	-0.993869	-0.172588	Yes
Tap1	23175	-1.14821	-0.13836	Yes
Psmb9	23244	-1.33639	-0.0973431	Yes
Isg15	23259	-1.38208	-0.0525045	Yes
Dhx58	23305	-1.71716	0.00201919	Yes

## Sheet: Figure 1D
Figure 1D - Source Data
Description: GSEA results for depletion of HALLMARK_INTERFERON_ALPHA_RESPONSE genes in Ifnlr1-/- mice relative to WT mice
SYMBOL	RANK IN GENE LIST	RANK METRIC SCORE	RUNNING ES	CORE ENRICHMENT
1700057G04Rik	465	0.720713	0.00665584	No
Plscr2	699	0.631303	0.019974	No
Ifitm7	2434	0.381101	-0.0404318	No
Trim14	4535	0.224903	-0.122332	No
H2-T24	4697	0.211742	-0.121424	No
Gm7030	5097	0.185448	-0.131711	No
Cxcl11	5676	0.154609	-0.150827	No
Trim21	5985	0.140103	-0.158881	No
Gbp2b	6073	0.136216	-0.157585	No
Gm11127	6267	0.127218	-0.161175	No
Samd9l	7778	0.0701256	-0.223449	No
Wars	7818	0.0681843	-0.222605	No
Eif2ak2	8113	0.0588321	-0.233061	No
Plscr1	8467	0.048019	-0.24645	No
B2m	9812	0.00896577	-0.303853	No
H2-M10.3	11019	0	-0.35566	No
Oas1e	11021	0	-0.355703	No
Oas1h	11023	0	-0.355746	No
Ifih1	12966	-0.010138	-0.438794	No
Trim26	13076	-0.0126881	-0.443007	No
Casp1	13294	-0.0190221	-0.451626	No
Cmpk2	13586	-0.0271241	-0.463124	No
Bst2	14039	-0.0404448	-0.481047	No
Rnf31	14267	-0.047121	-0.489057	No
Ifitm3	14664	-0.0582238	-0.503916	No
Epsti1	16292	-0.108273	-0.569807	No
Gbp2	16969	-0.133766	-0.593903	No
Ifitm2	17395	-0.150673	-0.606593	No
Psme1	17408	-0.151525	-0.601509	No
Uba7	17609	-0.160664	-0.604164	No
Parp12	18064	-0.175126	-0.617195	No
Isg20	18162	-0.179902	-0.614715	No
Mx2	18178	-0.180738	-0.608681	No
Irf7	18490	-0.198672	-0.614699	No
Trim30a	18710	-0.211436	-0.616294	No
Ifitm1	18942	-0.229087	-0.617752	Yes
Tdrd7	18943	-0.229213	-0.609283	Yes
Nmi	19332	-0.247507	-0.616805	Yes
Ly6e	19337	-0.247976	-0.607814	Yes
Parp14	19347	-0.248911	-0.599003	Yes
Parp9	19375	-0.251127	-0.590883	Yes
Trim25	19380	-0.251669	-0.581756	Yes
Ifit2	19389	-0.252124	-0.572783	Yes
Ifi35	19669	-0.273387	-0.574666	Yes
Psme2b	19838	-0.287601	-0.571256	Yes
Lgals3bp	19851	-0.289228	-0.561084	Yes
Adar	19873	-0.291183	-0.551227	Yes
Irf1	19972	-0.293578	-0.544589	Yes
Psme2	20165	-0.312491	-0.54129	Yes
Ifit3	20365	-0.331094	-0.537604	Yes
Oasl1	20374	-0.331705	-0.525691	Yes
Pnpt1	20921	-0.384993	-0.53492	Yes
Mx1	20922	-0.385078	-0.520691	Yes
Herc6	20940	-0.386449	-0.507142	Yes
Psmb8	20991	-0.394651	-0.494707	Yes
Irf9	21022	-0.397413	-0.481311	Yes
Psmb9	21422	-0.431406	-0.48251	Yes
H2-M9	21742	-0.45633	-0.479352	Yes
Sp110	21762	-0.458153	-0.463239	Yes
Ifi44	21977	-0.488466	-0.454382	Yes
Usp18	22602	-0.633465	-0.457781	Yes
Oas1b	22655	-0.650615	-0.435974	Yes
Rsad2	22739	-0.686512	-0.414172	Yes
Ddx60	22815	-0.72957	-0.390436	Yes
Cxcl10	22914	-0.774669	-0.366021	Yes
Tap1	22926	-0.780441	-0.337655	Yes
Helz2	23005	-0.849779	-0.309606	Yes
Ube2l6	23053	-0.893946	-0.278593	Yes
Oas1c	23083	-0.919954	-0.245846	Yes
Isg15	23264	-1.30371	-0.205405	Yes
Dhx58	23270	-1.33998	-0.156106	Yes
Oas1g	23272	-1.34531	-0.106439	Yes
Rtp4	23298	-1.46245	-0.0534746	Yes
Oas1a	23306	-1.5088	0.00197598	Yes

## Sheet: Figure 1E
Figure 1E - Source Data
Description: GSEA results for depletion of HALLMARK_INTERFERON_ALPHA_RESPONSE genes in ABX-treated Ifnlr1-/- mice relative to Ifnlr1-/- mice
SYMBOL	RANK IN GENE LIST	RANK METRIC SCORE	RUNNING ES	CORE ENRICHMENT
1700057G04Rik	168	0.911962	0.0465256	No
Oas1a	390	0.740584	0.0806751	No
Oas1g	817	0.588365	0.097048	No
Oas1c	1677	0.439439	0.0860442	No
H2-T24	1851	0.424015	0.1036	No
Oas1b	3877	0.270518	0.0325535	No
Cxcl11	3942	0.265963	0.0454776	No
Gbp2b	4029	0.258741	0.057031	No
Cmpk2	4213	0.244	0.0635489	No
Plscr2	4685	0.218954	0.0562192	No
Plscr1	5062	0.194482	0.0515282	No
Dhx58	5847	0.151874	0.0267998	No
Ddx60	6545	0.121381	0.00401169	No
Mx2	6553	0.121134	0.0108495	No
Rsad2	6862	0.109258	0.00405732	No
Trim26	7576	0.0832907	-0.0216628	No
Wars	7903	0.0734599	-0.0313378	No
Helz2	8017	0.0698989	-0.0320728	No
Trim14	8734	0.0499652	-0.0598856	No
Trim25	8960	0.0441416	-0.0669497	No
Oasl1	9553	0.0280395	-0.090728	No
Psme2b	10030	0.0155728	-0.110258	No
Irf1	10406	0.00665387	-0.125975	No
Eif2ak2	10637	0.00120534	-0.135784	No
H2-M10.3	11408	0	-0.168861	No
Oas1e	11410	0	-0.168904	No
Oas1h	11412	0	-0.168947	No
H2-M9	11457	0	-0.170837	No
Parp12	12971	-0.00117286	-0.235762	No
Ifitm7	13156	-0.00589906	-0.243318	No
Irf9	13265	-0.00881652	-0.247438	No
Rtp4	13713	-0.019308	-0.265502	No
Psme2	15317	-0.0633652	-0.330628	No
Adar	15558	-0.0708192	-0.336765	No
Ifitm2	16364	-0.0982334	-0.365556	No
Psme1	16616	-0.10781	-0.369985	No
Ifih1	16862	-0.117733	-0.373572	No
Pnpt1	17057	-0.126372	-0.374458	Yes
Nmi	17064	-0.126703	-0.367249	Yes
Rnf31	17317	-0.137737	-0.369958	Yes
Parp14	17514	-0.146532	-0.369742	Yes
Ifitm3	17608	-0.151815	-0.364791	Yes
Casp1	17686	-0.156216	-0.358892	Yes
Sp110	17843	-0.165422	-0.355845	Yes
B2m	18078	-0.177414	-0.355442	Yes
Ifi35	18196	-0.183615	-0.349648	Yes
Parp9	18210	-0.184573	-0.339329	Yes
Samd9l	18367	-0.196027	-0.334478	Yes
Epsti1	18419	-0.198869	-0.32495	Yes
Mx1	18735	-0.221609	-0.325422	Yes
Ifi44	18763	-0.2235	-0.31341	Yes
Isg20	18804	-0.22652	-0.30178	Yes
Lgals3bp	18820	-0.22731	-0.289029	Yes
Ube2l6	18845	-0.228497	-0.276594	Yes
Irf7	19307	-0.256058	-0.281308	Yes
Psmb8	19383	-0.261209	-0.269136	Yes
Tdrd7	19696	-0.286768	-0.26564	Yes
Usp18	19826	-0.292094	-0.253968	Yes
Trim30a	19977	-0.307844	-0.24227	Yes
Psmb9	20146	-0.316314	-0.230846	Yes
Ly6e	20159	-0.318212	-0.212609	Yes
Gbp2	20210	-0.322798	-0.195735	Yes
Gm11127	20489	-0.344819	-0.187356	Yes
Gm7030	20903	-0.376941	-0.182884	Yes
Ifitm1	20987	-0.383327	-0.16386	Yes
Cxcl10	21031	-0.384395	-0.143055	Yes
Uba7	21072	-0.388453	-0.121881	Yes
Ifit2	21100	-0.391635	-0.0999617	Yes
Tap1	21208	-0.401702	-0.0808856	Yes
Bst2	21543	-0.428128	-0.0700035	Yes
Trim21	22438	-0.573018	-0.0746389	Yes
Herc6	22598	-0.618283	-0.0450334	Yes
Ifit3	22672	-0.641235	-0.0103809	Yes
Isg15	22765	-0.671108	0.0252158	Yes

## Sheet: Figure 1F
Figure 1F - Source Data
Description: Genes with a directional fold change greater than 2, with an adjusted pvalue of less than 0.5; and genes falling in each venn diagram area
List:		Genes down in WT with ABX			Genes down in Ifnlr1-/- relative to WT			Genes down in Ifnlr1-/- with ABX			Genes up in WT with IFNL tx			Down with ABX and in Ifnlr1-/-		Down with ABX and up with IFNL		Down in Ifnlr1-/- and up with IFNL		Down with ABX, down with Ifnlr1-/-, up with IFNL
Number Genes:		317			85			81			262			54		48		26		22
		Ces2a			Ifit1			Ces2a			Slfn4			1600029D21Rik		Ddx60		Ddx60		Ddx60
		Slc6a14			Gm21464			Cyp2c55			Ifi44			2010002M12Rik		Dhx58		Dhx58		Dhx58
		Duox2			Rsad2			Slc6a14			Oas3			Acta1		Gm12250		Gm12250		Gm12250
		Acta1			Isg15			Reg3g			I830012O16Rik			Ccl5		Gm14446		Gm14446		Gm14446
		Reg3b			Prmt1			Saa1			Ly6a			Cd3g		Gm5431		Gm5431		Gm5431
		Cyp3a25			Oas1g			Cyp3a25			Bst2			Cd7		H2-T10		H2-T10		H2-T10
		Cyba			Oasl2			Cyp3a44			Usp18			Cd74		Helz2		Helz2		Helz2
		Duoxa2			Atp6v0c			Iglc2			Rsad2			Cd8a		Ifi47		Ifi47		Ifi47
		Dio1			Fmr1nb			Slc28a2			Ifit3			Ceacam10		Ifit1		Ifit1		Ifit1
		H2-Eb1			Ceacam10			Duox2			Oas2			Duox2		Igtp		Igtp		Igtp
		Reg3g			H2-Aa			Nos2			Phf11b			Fgd6		Il18bp		Il18bp		Il18bp
		Exoc3l4			Rtp4			Reg3b			Trim30a			Gzma		Irgm2		Irgm2		Irgm2
		H2-Aa			Oas3			Fam84a			Cmpk2			H2-Aa		Isg15		Isg15		Isg15
		Cyp3a44			H2-DMb1			Cyp3a11			Isg15			H2-Ab1		Nlrc5		Nlrc5		Nlrc5
		Mical1			Igj			Fgf15			Irf7			H2-DMa		Oas3		Oas3		Oas3
		Ccl5			Ifnlr1			Slc2a2			Apol9b			H2-DMb1		Oasl2		Oasl2		Oasl2
		Ly6e			GOLT1A			Igha			Dhx58			H2-Eb1		Rnf213		Rnf213		Rnf213
		Cd74			Gm12250			Duoxa2			Ifit1			Igha		Rsad2		Rsad2		Rsad2
		Gm14446			Stat1			Fut2			Ifi204			Igj		Rtp4		Rtp4		Rtp4
		Stat1			Cdc20			Gstm3			Apol9a			Insl3		Stat1		Stat1		Stat1
		Ceacam10			Irf9			Mal			Phf11d			Itgb7		Upp1		Upp1		Upp1
		Zbp1			Mid1			H2-Ab1			Rnf213			Lck		Zbp1		Zbp1		Zbp1
		Cd7			mt-Tr			Igj			Oas1g			Lyn		2010005H15Rik		Apol9b
		Nos2			Igha			2010107G12Rik			Trex1			Nkg7		Apol9a		Ifi27l2b
		Gm5431			Lyn			Defb39			Oasl1			Nrgn		C2		Irf9
		H2-Ab1			Nlrc5			Hmgcs2			Slfn2			Prmt1		Cd274		Oas1g
		Irf8			H2-Eb1			Dio1			Gbp3			Psmb8		Dtx3l
		Isg15			Gm14446			Enc1			Samhd1			Socs1		Gbp6
		Psmb8			Dhx58			4931406C07Rik			Gm5431			Tap2		Gm6644
		Psmb10			Helz2			Ces2c			Oasl2			Usf2		H2-Q1
		Upp1			Ifi27l2b			Cyba			Slfn5			Zc3h12a		H2-T22
		Bst1			Cd74			Pglyrp1			Ddx60			Zfp456		Ifi35
		Lyn			Ddx60			Osbpl9			Ly6e			Ddx60		Lgals9
		Oasl2			Gm14121			H2-Q1			Mx1			Dhx58		Ly6a
		Ly6a			Sprr1a			Akr1b7			Il18bp			Gm12250		Ly6e
		H2-DMb1			Hcfc1			H2-Aa			2310014L17Rik			Gm14446		Lypd8
		Ifi47			Kif23			C2			Lypd8			Gm5431		Mlkl
		Gsdmc4			H2-Ab1			Itgb6			Rtp4			H2-T10		Psmb9
		Apol10a			Gzma			Gzma			Herc6			Helz2		Sectm1a
		Psmb9			Cdca3			H2-Q7			Parp11			Ifi47		Slfn2
		Dhx58			Insl3			Bst1			Xaf1			Ifit1		Sp110
		Naip1			2010002M12Rik			Dmbt1			Sass6			Igtp		Tnfsf10
		Ifit1			Gm5431			Jun			Lgals3bp			Il18bp		Trim30a
		Nlrc5			S100g			Hspa1a			Mlkl			Irgm2		Trim5
		Gm15658			Nkg7			H2-Eb1			Plscr2			Isg15		Uba7
		Gm11545			Ccl5			Exoc3l4			Zbp1			Nlrc5		Ube2l6
		Gm12250			H2-DMa			Gcnt1			Gm14446			Oas3		Usp18
		Gsdmc2			Tap2			Cd3g			Ifit2			Oasl2		Xdh
		Itgb7			Duox2			Btg1			Ddx58			Rnf213
		Igtp			Upp1			Cd74			Tor3a			Rsad2
		Mfsd4			Wsb1			Sema6d			Ube2l6			Rtp4
		Tap2			Pygl			Cox6b2			Oas1b			Stat1
		Unc93b1			Irgm2			H2-Q2			AW011738			Upp1
		Ccl28			Cd8a			Btg2			Ifi27l2b			Zbp1
		Gzmb			Zbp1			Pdzrn4			Sp100
		AA467197			Zc3h12a			H2-M2			Ifih1
		Tnfrsf17			Nup85			Kdm5d			Adar
		Fgf15			Acta1			Ada			Gm12250
		H2-DMa			Rnf213			Arhgap9			Phf11a
		Pglyrp1			1600029D21Rik			Zfp385b			4930599N23Rik
		Fam84a			Nrgn			Ccl5			Parp12
		Ctsw			Asf1b			Kif3c			Samd9l
		Dtx3l			Apol9b			Tmem8b			Zcchc2
		Cyp2c55			Psmb8			Gpr114			Trim34a
		Lck			Ifi47			Lpxn			Dtx3l
		Slc30a1			Acacb			Dtd1			Slfn1
		Gbp6			Avil			Igtp			Ccnd2
		Slc25a22			Usf2			Rwdd2b			Irgm1
		Ly75			Dennd6b			Ece2			Ogfr
		Nrgn			Cd7			Apod			Ehd4
		Ube2l6			Fgd6			Gm14435			Ifi47
		Gm7849			Socs1			Gem			Cnp
		Helz2			Il18bp			Ggt5			Mocos
		AY761184			Igtp			Tmod1			Znfx1
		Xdh			Hk2			Abi3bp			A630081J09Rik
		Socs1			Cd3g			Igkc			Spats2l
		Pla2g4c			Lck			Gfod1			Gm11425
		Iglc2			Mastl			Pcsk1n			Ifi203
		Prss27			Bfsp1			Mrps23			Tnfsf10
		Abhd3			H2-T10			H2-DMa			9930111J21Rik2
		Glipr2			Gm8566			Usb1			Fbxw17
		Nr6a1			Zfp456						Trim12a
		Gm11127			Itgb7						Ifi35
		Tgm2			Mras						Helz2
		Vwa5a			Fabp5						Igtp
		Gimap7									Mndal
		Cd8a									Daxx
		Arid3a									Cpsf2
		Osbpl7									C2
		Zc3h12a									Pml
		Nfkbia									Tlr3
		Ighg2b									Stat2
		Igha									Gmppb
		Arhgap4									Rnf31
		1810065E05Rik									Agrn
		Cish									Mitd1
		Slc40a1									9530082P21Rik
		Matk									Epsti1
		Rnase6									Gbp7
		Gpx2									Tcirg1
		Zfp36									Plac8
		Slc46a1									Rtn4rl1
		Sst									Hsh2d
		Foxo6									Grina
		Lypd8									Mnda
		1600029D21Rik									Sp110
		Cd38									Uba7
		B2m									Gbp9
		Ddx60									Ifitm3
		H2-Q6									Eif2ak2
		Ccr9									Cd274
		Adam15									G3bp2
		Myo1g									Parp10
		Dmbt1									Gnl1
		Gm15920									A930015D03Rik
		Cd96									Tomm40
		Atl2									Batf2
		Gzma									Stat1
		Sp110									Mtf1
		Ikzf3									Ift172
		Derl3									Ifi27l2a
		H2-Q1									Tor1aip1
		Rac2									Nampt
		Rnf213									D5Ertd579e
		Arhgap30									Trim56
		6330416G13Rik									Ccrl2
		Tat									Irf9
		Cd3e									Gm15903
		Rsad2									Dmrt3
		Uba7									Tmem184b
		Rpl27-ps3									Fam122a
		Trbc2									Mx2
		B3gnt7									Oas1a
		Slc35f2									Trafd1
		Muc13									Acadl
		Ikzf1									Shisa5
		Cd177									Cpped1
		BC021891									Gm4951
		Gpr65									Psmb9
		Irf1									Sfxn2
		Apaf1									Gm26797
		Trim40									Slc25a28
		Fcgrt									Asap3
		Cd53									Xdh
		Tnfaip2									Parp14
		Irf4									Gca
		Klrd1									Irgm2
		Cyp3a11									Sppl2a
		Cd300lf									Sectm1a
		Bcl2a1b									Ifi205
		Trim30a									Asb13
		Tnfrsf13b									Enpp4
		C2									Ehf
		Irgm2									2900056M20Rik
		Igj									Trmt5
		Slc39a4									Cox18
		Nkg7									Gm15542
		G6pc									Rps27a-ps2
		H2-T10									Trim30c
		Dusp6									Trim5
		Ifi35									Eif3j1
		Cd52									Stard3
		Rasal3									Tirap
		Cd79b									Fam46a
		H2-M2									Nt5c3
		Cldn4									Rbm43
		Vav1									Mrps18b
		2010002M12Rik									Gm24846
		Tapbpl									Prr3
		Arhgap9									Athl1
		2010005H15Rik									Crcp
		Oas3									A1cf
		Lgals9									Slfn10-ps
		Smco4									Nlrc5
		Nfil3									Gm13822
		Hmgcs2									Gm4841
		Mzb1									Plekhn1
		Prmt1									Cmtr1
		Padi2									H2-T22
		Slc28a2									Iigp1
		Bid									H2-Q4
		Prkcb									Trim6
		Lcp1									H2-Q10
		H2-Q7									Nfix
		Cd3g									Krtcap3
		Rtp4									Wdr74
		Gm12216									Isg20
		Ern1									Gm14137
		Fermt3									9130230L23Rik
		H2-T3									Ints2
		Akr1b7									Arel1
		Hck									Rassf9
		Slfn2									Mb21d1
		Terf2									Gm14567
		Apol9a									Edaradd
		Ptprc									Sp140
		Map3k4									Gm10557
		BC096441									Gbp6
		Pbx4									Trim12c
		Ppp1r16b									Odf2l
		Rassf5									Fap
		Itgal									H2-Q1
		Pik3cd									Gm6644
		Strip1									B430010I23Rik
		Apol7b									Olfr56
		Gprasp2									Lgals9
		Trim5									Nop9
		Cd28									Zufsp
		Sh2d6									Xylt1
		Igkc									Clca1
		H2-T22									1700056N10Rik
		Muc4									Ap5b1
		Il20rb									9330159N05Rik
		Hvcn1									Cxcr2
		Gdpd5									Podxl
		Adora2a									Cep57l1
		Adm									Papd7
		Fam214a									Ajuba
		AI662270									Ube2c
		Ido1									Hmgb1-ps5
		Rasgrp1									Oas1c
		Cd274									Gm21971
		Inpp1									2010005H15Rik
		2010107G12Rik									1810026J23Rik
		Rab19									Adh6a
		Il7r									Gfod2
		Gpr126									Rmi2
		Clca4									Prrx1
		Asb3									Morc3
		Tnfsf10									Gm6286
		Cd37									1700123I01Rik
		Gpr132									Ascc3
		Runx3									Pnpt1
		Cdc45									Gm12284
		Gm14851									Tmem181c-ps
		Cd48									Slfn8
		Crym									Csrnp3
		Gm15834									Aadac
		Pdzk1ip1									Camkk2
		Gm15776									Gm26981
		Ntrk2									Mecom
		Akna									Irf5
		Fcho1									Gm16685
		Lax1									H2-T10
		Gata3									Mcm5
		Cd79a									H2-T24
		Usp18									Gm22426
		Siva1									Gm26670
		Trpm5									Upp1
		Sh3bp1									Mmp16
		Rpl10-ps6									Gm10182
		Coro1a									Pbk
		9330151L19Rik									Mcm6
		Steap3									Hmga2
		Syt5									Gm16042
		Itgax									B3gnt5
		Fgd6									Apol10b
		Il34									Gm26591
		Traf3ip3									Gdap10
		Irgq									Gm9774
		Cdon									Tyw5
		Lilra5									Insl5
		Ikzf2
		Gm10031
		Gpr171
		Srgn
		Usf2
		Dll1
		Cxcr6
		Il17d
		Il18bp
		1700011H14Rik
		Plcb2
		Fut2
		Rilpl2
		RP24-113D21.1
		Cd4
		A430104N18Rik
		Wdyhv1
		P2ry10
		Ripk2
		Zfp456
		Insl3
		1500009L16Rik
		Pfkfb3
		Gm11131
		Sh2d7
		Efna5
		Mreg
		Celsr1
		Proz
		Arhgdib
		Prrt1
		Cyp2c40
		Il21r
		Slc10a4
		mt-Nd6
		Limd2
		Ccl8
		Mlkl
		Gm26687
		Map4k1
		Sectm1a
		mmu-mir-8097
		Bmx
		Leap2
		Fam46c
		Cblb
		Psme2b
		Cyth4
		Exo1
		Il22ra2
		Rdh16
		Gm6644
		Ly6d
		Ms4a6b
		Bex4

## Sheet: Figure 1G
Figure 1G - Source Data
Description: Counts of tonic ISGs in ileum tissue RNA seq
	WT + IFN-λ	WT + IFN-λ	WT + IFN-λ	WT + IFN-λ	WT	WT	WT	WT + ABX	WT + ABX	WT + ABX	WT + ABX	Ifnlr1-/-	Ifnlr1-/-	Ifnlr1-/-	Ifnlr1-/-	Ifnlr1-/- + ABX	Ifnlr1-/- + ABX	Ifnlr1-/- + ABX	Ifnlr1-/- + ABX
Ddx60	10.9311	11.1434	9.2357	10.9535	7.1632	6.8705	6.2896	5.497	5.8086	4.2523	5.823	4.9158	5.1584	5.9765	4.1461	5.2111	4.8714	5.6887	5.4306
Dhx58	9.7782	9.6148	8.4399	8.6329	5.1926	4.5409	4.6191	2.4824	2.7365	1.8553	2.2784	3.5032	2.601	2.7546	2.1887	3.1424	3.2702	4.6861	1.164
Gm14446	11.6538	12.1046	10.5299	11.3931	8.3118	8.0346	5.9966	4.9036	4.8469	4.6912	5.425	5.2138	6.573	4.8216	4.7769	4.1416	4.4572	4.8416	5.4757
Gm5431	7.5098	7.5565	6.2364	6.8293	3.163	4.1153	3.4889	0.344	0.8972	-0.5215	1.3202	0.6313	2.7253	0	2.7721	0	0	-2.4137	0.4145
H2.T10	6.1004	5.8337	4.7291	5.5823	4.2163	4.4058	4.1914	2.401	3.5014	1.132	2.1543	3.2158	3.4673	3.4614	3.2795	2.9314	1.6879	2.6096	3.4298
Helz2	7.2657	7.4032	6.844	6.8379	5.8082	5.2332	5.295	3.8915	4.3574	3.1101	3.7387	3.3936	4.3473	3.6851	4.0275	4.3141	3.6317	4.1779	3.768
Ifi47	8.5574	8.7844	7.848	8.0986	6.4151	6.0402	4.334	3.2618	3.476	3.4823	2.8538	4.673	4.267	4.1674	3.0531	3.7297	3.2702	2.9908	3.084
Ifit1	11.1946	11.5335	11.3003	11.7634	7.269	8.3394	6.9066	4.8775	4.8717	3.3886	6.266	4.3081	5.2122	5.2035	5.3395	3.778	3.9844	3.7585	4.4638
Igtp	9.3792	9.3724	8.2257	7.9922	6.5931	6.425	3.8713	3.1086	3.2208	2.8162	4.2837	4.4351	4.9891	2.1209	4.0895	3.2332	0.8048	0	0.6701
Il18bp	7.8157	7.9262	7.1272	7.4376	4.4717	4.8914	3.7747	2.7968	3.0475	3.4823	4.4503	3.2158	3.1727	2.9848	2.5717	2.3433	3.4099	2.7689	2.6084
Irgm2	6.6828	7.4274	6.5141	6.8589	5.3529	5.7265	3.0528	2.3293	2.4463	0.5171	4.8152	3.2651	3.4673	2.4362	2.1887	2.0203	2.1989	3.6355	3.0331
Isg15	11.0265	11.5944	10.3063	10.4451	6.1625	5.7579	4.706	2.9209	2.5189	1.7326	3.8951	2.8018	4.1659	2.2941	2.9983	2.2377	0.5805	2.1119	2.7197
Nlrc5	6.2197	6.4793	6.3918	6.4022	4.7333	5.4662	2.1689	0.2825	0.2891	0	1.9485	1.8688	1.2821	0	0.5609	0.3192	0	0	1.545
Oas3	8.3835	8.4974	7.8357	8.3021	4.6921	3.8058	3.8197	1.483	2.5284	2.2409	3.4437	1.771	2.2122	-1.9334	-3.396	0.5385	0	0	2.5219
Oasl2	10.7464	10.6108	10.2897	10.6642	7.7775	6.8277	5.9901	3.7564	5.2196	3.9518	4.8811	4.5084	4.8048	3.6851	3.4805	4.2652	4.1447	3.4833	4.3039
Rnf213	10.3459	9.8897	9.7808	9.9563	7.2053	6.9342	5.9901	5.1021	5.7038	4.9107	5.8503	5.8683	5.988	5.2954	5.8113	5.7184	5.4634	5.7524	5.6995
Rsad2	12.9996	13.1965	12.1875	12.4075	8.5574	8.2711	7.6355	5.7546	6.4795	6.307	7.7276	6.4213	5.988	6.4771	5.8564	6.3275	6.2143	6.5608	6.7457
Rtp4	8.0339	7.7153	7.6672	8.1794	5.3529	4.7575	3.8713	1.5935	1.7179	0	4.3903	1.6277	0	1.0759	3.0531	1.5327	1.6879	1.2522	1.164
Stat1	10.396	10.7898	9.0181	9.8886	8.4569	8.4028	7.2771	5.7038	6.5016	6.1497	6.0365	6.8349	7.0013	6.7889	6.594	5.9831	5.317	6.0479	5.6718
Upp1	10.5035	10.4451	9.9593	10.8127	9.9563	9.7426	7.1846	6.3465	6.5711	4.2523	6.932	6.4027	7.789	7.6016	7.9066	6.0154	7.279	6.5135	5.6113
Zbp1	8.3678	8.4492	6.881	8.0696	5.2438	5.3425	3.6857	1.1645	1.7179	1.5547	0	2.317	3.3429	2.4362	4.0895	0.7575	1.6879	2.7689	1.858
