# Supplementary material for: Homeostatic interferon-lambda response to bacterial microbiota stimulates preemptive antiviral defense within discrete pockets of intestinal epithelium
Source: eLife. 2022 Feb 9;11:e74072. doi: 10.7554/eLife.74072 (PMC8853662; doi:10.7554/eLife.74072)
Supplement: Figure 2—figure supplement 1—source data 1. [file elife-74072-fig2-figsupp1-data1.xlsx]

## Sheet: Figure 2 - Figure Supplement 1
Figure 2 - Figure Supplement 1 - Source Data
Description: Ifit1, Stat1, and Oas1a gene expression normalized to Rps29 from paired ileum and colon tissue
Ifit1				Stat1				Oas1a
Genotype	WT	WT		Genotype	WT	WT		Genotype	WT	WT
Tissue	Ileum	Colon		Tissue	Ileum	Colon		Tissue	Ileum	Colon
	0.00433445	0.0162549			0.0578132	0.0934227			0.0556973	0.102013
	0.0156784	0.0253557			0.069944	0.0627214			0.0692153	0.0880454
	0.0507375	0.0103917			0.11477	0.0411254			0.158653	0.0961578
	0.0152092	0.00462809			0.114741	0.0191547			0.120138	0.0542989
	0.00594895	0.0178389			0.0715035	0.0337936			0.0612016	0.08244
	0.0288507	0.0137101			0.0543295	0.0524957			0.102698	0.067204
	0.0737718	0.0195937			0.153377	0.0480869			0.188504	0.0899669
	0.0538957	0.0192505			0.135086	0.0434647			0.121808	0.0687152
	0.0293478	0.0249829			0.111174	0.0665334			0.0896541	0.0967516
	0.0275606	0.0486752			0.234653	0.135352			0.106173	0.134161
	0.0294774	0.0212479			0.265281	0.096386			0.121172	0.0918965
	0.0343562	0.0129322			0.24579	0.0711121			0.158105	0.0614801
	0.025123	0.0105707			0.242232	0.0793149			0.114595	0.064223
	0.0834766	0.0230537			0.535787	0.0929846			0.194363	0.101088
	0.122271	0.0167449			1.08296	0.0613135			0.263801	0.0549926
	0.0821692	0.0135674			0.61849	0.0919976			0.124764	0.0835704
	0.045819	0.0165073			0.302945	0.0694674			0.176656	0.09651
	0.0711479	0.030237			0.592743	0.1202			0.149825	0.11521
	0.0796109	0.0296815			0.368233	0.112779			0.229489	0.100443
	0.104055	0.0249267			0.950498	0.145355			0.204671	0.10312
	0.107075	0.0256215			0.686773	0.092077			0.183454	0.0902727
	0.0370455	0.00525788			0.184343	0.0814586			0.112192	0.08343
	0.070099	0.0124782			0.354672	0.0810029			0.191783	0.071285
	0.043528	0.0285636			0.316482	0.115716			0.136782	0.114533
	0.0671981	0.0328864			0.408396	0.142776			0.1693	0.160363
Statistical Test
Paired t test					Paired t test				Paired t test
P value	<0.0001				P value	<0.0001			P value	0.0001
P value summary	****				P value summary	****			P value summary	***
Significantly different (P < 0.05)?	Yes				Significantly different (P < 0.05)?	Yes			Significantly different (P < 0.05)?	Yes
One- or two-tailed P value?	Two-tailed				One- or two-tailed P value?	Two-tailed			One- or two-tailed P value?	Two-tailed
t, df	t=4.970, df=24				t, df	t=4.756, df=24			t, df	t=4.596, df=24
Number of pairs	25				Number of pairs	25			Number of pairs	25
