# Supplementary material for: Homeostatic interferon-lambda response to bacterial microbiota stimulates preemptive antiviral defense within discrete pockets of intestinal epithelium
Source: eLife. 2022 Feb 9;11:e74072. doi: 10.7554/eLife.74072 (PMC8853662; doi:10.7554/eLife.74072)
Supplement: Figure 2—figure supplement 2—source data 1. [file elife-74072-fig2-figsupp2-data1.xlsx]

## Sheet: Figure 2 - Figure Supplement 2
Figure 2 - Figure Supplement 2 - Source Data
Description: Ifit1, Stat1, and Oas1a gene expression normalized to Rps29 from the ileum of mice treated with and without abx. Abx -treated mice were injected with increasing concentrations of IFN-lambda
Ifit1						Stat1						Oas1a
Genotype	WT	WT				Genotype	WT	WT				Genotype	WT	WT
Tissue	Ileum	Colon				Tissue	Ileum	Colon				Tissue	Ileum	Colon
ABX	-	+	+	+		ABX	-	+	+	+		ABX	-	+	+	+
IFN-lambda	-	-	0.01ug	0.1ug		IFN-lambda	-	-	0.01ug	0.1ug		IFN-lambda	-	-	0.01ug	0.1ug
	1.51818	0.408602	1.94948	20.5563			1.36326	0.57268	1.14847	6.2147			1.32899	0.688133	2.84523	12.3532
	0.481817	0.169073	2.61163	28.7068			0.636745	0.543308	1.55821	5.47695			0.671004	0.593364	3.58473	12.8616
	1.10835	0.26943	1.25074	24.553			1.18092	0.291056	1.38428	6.3378			1.23977	0.652585	2.40728	17.5533
	0.891654	0.14873	0.123522	12.1499			0.819083	0.248351	0.292373	1.53349			0.760226	0.45097	0.415637	12.6116
	0.936294	0.088439	0.441135	13.6092			0.750669	0.191012	0.389748	1.67944			1.07403	0.416563	1.57916	9.64902
	1.12045	0.151719	2.1375	11.9173			1.30154	0.23943	0.544176	1.47087			0.947674	0.51964	3.30656	10.7885
	0.943256	0.194511	0.449431	0.131797			0.947787	0.335214	0.462768	0.300512			0.978294	0.751578	0.736006	0.558288
		0.3434	0.278628	12.048				0.426888	0.384564	1.1506				0.909769	0.453781	12.9755
		0.095979	0.0269132	0.203891				0.220439	0.0599749	0.305099				0.426441	0.166383	0.629069
		0.233372	0.276019	8.99426				0.532703	0.308669	1.29152				0.765877	0.671586	12.2847
		0.138924	0.392917	0.294826				0.447868	0.782608	0.510184				0.408955	0.981627	0.845727
		0.109406	0.529216					0.156192	0.679935					0.431427	2.56638
		0.280803						0.321769						0.856782
	Statistical Test						Statistical Test						Statistical Test
	Dunn's multiple comparisons test	Mean rank diff.	Significant?	Summary	Adjusted P Value		Dunn's multiple comparisons test	Mean rank diff.	Significant?	Summary	Adjusted P Value		Dunn's multiple comparisons test	Mean rank diff.	Significant?	Summary	Adjusted P Value
	WT + ABX vs. WT no ABX	-17.38	Yes	**	0.0094		WT + ABX vs. WT no ABX	-18.25	Yes	**	0.0058		WT + ABX vs. WT no ABX	-11.71	No	ns	0.1398
	WT + ABX vs. WT + ABX + 0.01μg IFN-λ	-11.05	No	ns	0.0837		WT + ABX vs. WT + ABX + 0.01μg IFN-λ	-9.038	No	ns	0.2165		WT + ABX vs. WT + ABX + 0.01μg IFN-λ	-10.08	No	ns	0.1346
	WT + ABX vs. WT + ABX + 0.1μg IFN-λ	-21.38	Yes	****	<0.0001		WT + ABX vs. WT + ABX + 0.1μg IFN-λ	-19.72	Yes	***	0.0004		WT + ABX vs. WT + ABX + 0.1μg IFN-λ	-20.64	Yes	***	0.0002
