# Supplementary material for: Homeostatic interferon-lambda response to bacterial microbiota stimulates preemptive antiviral defense within discrete pockets of intestinal epithelium
Source: eLife. 2022 Feb 9;11:e74072. doi: 10.7554/eLife.74072 (PMC8853662; doi:10.7554/eLife.74072)
Supplement: Figure 2—source data 1. [file elife-74072-fig2-data1.xlsx]

## Sheet: Figure 2A
Figure 2A - Source Data
Description: Gene expression of ISGs in ileum tissue normalized to WT (no ABX) mice.
Ifit1							Stat1							Oas1a
Genotype	WT	WT	Ifnlr1 -/-	Ifnlr1 -/-			Genotype	WT	WT	Ifnlr1 -/-	Ifnlr1 -/-			Genotype	WT	WT	Ifnlr1 -/-	Ifnlr1 -/-
ABX	-	+	-	+			ABX	-	+	-	+			ABX	-	+	-	+
	0.605082	0.060695	0.453139	0.161422				0.706295	0.334921	1.71032	0.857166				0.719432	0.308425	0.441683	0.517465
	1.39492	0.034838	0.436918	0.22835				1.29371	0.288739	1.08144	1.19652				1.28057	0.190611	0.42037	0.464193
	1.02049	0.280308	0.224034	0.094274				1.01962	0.94777	0.522621	0.579706				0.998478	0.787712	0.253299	0.34224
	0.979507	0.030886	0.418056	0.017332				0.980382	0.348661	0.809666	0.228397				1.00152	0.274099	0.380254	0.115577
	1.31538	0.048027	0.704488	0.016872				1.42524	0.364945	1.27506	0.286988				1.23164	0.38359	0.463978	0.134855
	0.342259	0.045423	0.059039	0.020248				0.574761	0.293743	0.362091	0.284352				0.621276	0.176838	0.159352	0.12328
	0.770294	0.026128	0.118732	0.101673				0.812394	0.111386	0.691478	0.592199				0.689641	0.26202	0.16852	0.266054
	0.807228	0.08522	0.408106	0.041182				1.00776	0.225487	1.3299	0.322224				1.09764	0.432242	0.294975	0.257097
	1.48728	0.05866	0.167722	0.039573				0.972516	0.103325	0.521169	0.234275				1.05656	0.300264	0.250758	0.163369
	1.27756	0.06134	0.306501	0.031832				1.20733	0.218953	0.692049	0.257175				1.30324	0.395344	0.38146	0.140595
	0.908674	0.245442	0.563168	0.394643				1.1991	0.275467	0.689499	0.82914				1.0418	0.925001	0.504085	0.453486
	1.09133	0.021078	0.257684	0.350421				0.800904	0.23119	0.354874	0.668762				0.958196	0.279542	0.188411	0.708974
	0.384448	0.088131	0.333838	0.70113				0.605832	0.459699	0.671307	0.830505				0.52766	0.521003	0.300706	0.371391
	0.936734	0.092603	0.64013	0.40342				0.930098	0.378563	0.844708	0.342837				0.991178	0.478594	0.241761	0.557704
	0.941005	0.117569	0.348393	0.469217				1.25933	0.22963	0.753804	0.491445				1.87345	0.187407	0.181602	0.450044
	0.651796	0.11961	0.291212	0.046987				0.951024	0.238607	0.376313	0.20681				0.847252	0.270918	0.261559	0.17121
	2.07266	0.240969	0.283262	0.145836				1.25372	0.626652	0.530866	0.375791				0.760457	0.226296	0.188269	0.221306
	0.879806	0.121867	0.099972	0.090376				0.865029	0.336834	0.216664	0.296816				1.23323	0.229721	0.159343	0.222083
	0.980428	0.327028	0.04756	0.068948				0.695673	0.542043	0.178609	0.329776				0.885979	0.333254	0.13618	0.191668
	2.78938	0.105194	0.034783	0.012355				1.1488	0.275491	0.153856	0.04578				0.880794	0.164857	0.109534	0.056932
	0.340665	0.151844	0.044889	0.024768				0.500303	0.41072	0.192283	0.098472				1.01097	0.654005	0.206816	0.132623
	0.853272	0.096726	0.038278	0.01632				1.23122	0.299545	0.160278	0.068694				1.07252	0.195223	0.16192	0.126738
	0.574717	0.100756	0.220258	0.018481				1.08245	0.262226	0.66666	0.110323				0.916516	0.318492	0.280895	0.144395
	0.679585	0.043674	0.180175	0.057428				0.974874	0.164231	0.621364	0.365851				0.951011	0.409642	0.299647	0.23384
	0.351491	0.211979	0.309722	0.056511				0.698136	0.468973	0.660411	0.433047				1.04899	0.414691	0.274712	0.232061
	0.488491	0.063554	0.086333	0.10387				1.33773	0.240952	0.348645	0.404704				0.623341	0.14384	0.146597	0.205082
	2.06216	0.107264	0.216629	0.073389				1.46579	0.415701	1.03939	0.425574				1.00812	1.55796	0.160701	0.313865
	1.39344	0.108522	0.12042	0.055769				1.00984	0.521384	0.601746	0.455964				1.0853	0.451514	0.145355	0.224841
	0.633473	0.374227	0.180821	0.020619				0.958881	0.328271	0.734931	0.157345				1.40074	0.237735	0.154933	0.134417
	0.973089	0.055119		0.140069				1.03128	0.131288		0.845044				0.882507	0.852411		0.104388
	1.54147	0.378579		0.058787				1.28316	0.785061		0.259367				0.738967	0.22337		0.263528
	0.885822	0.113084		0.112905				1.02603	0.279373		0.373215				1.08809	0.310783		0.511274
	0.572703	0.103485		0.763035				0.690813	0.277916		0.657932				1.51031	0.355096		1.67676
	1.01805	0.216505		0.105017				1.00725	0.416551		0.502238				1.1034	0.260541		0.225854
	0.981946	0.093708		0.168227				0.992752	0.34823		0.886852				0.559236	0.49504		0.416395
	0.657358	1.69466		0.0377247				0.826067	1.07455		0.217231				1.06239	0.599956		0.183806
	1.71803	0.132621		0.177155				1.31808	0.34267		0.89131				1.0391	0.359631		0.362333
	1.34507	0.063201		0.271674				1.77085	0.214347		1.42628				0.941684	0.38695		0.528316
	0.500099	0.307321						0.392721	0.659324						0.768464	0.177425
	0.779441	0.26822						0.692283	0.870664						1.18836	0.146808
	0.307669	0.090559						0.43397	0.543925						1.12477	0.184365
	1.05815	0.158808						1.59622	0.491961						0.854072	0.235607
	1.17904	0.016525						1.57151	0.129492						1.02116	0.487334
	1.10983	0.015202						0.623141	0.08736						0.846886	0.369077
	1.34531	0.031169						0.775162	0.172554						1.15311	0.442915
	0.744131	0.029117						1.04993	0.16311						0.910229	0.460654
	1.97056	0.106718						1.26763	0.341326						0.661541	0.363471
	1.19555	0.11764						1.23314	0.48158						1.16886	0.561693
	0.583461	0.112073						0.850629	0.58198						0.831678	0.143318
	0.506296	0.211839						0.598677	0.874533						1.4277	0.098669
	1.50988	0.109979						1.20697	0.578342						1.1778	0.161624
	0.551492	0.230088						0.709152	0.883653						1.06176	0.189792
	0.938632	0.031666						1.08388	0.323853						0.71719	0.139046
	1.05561	0.026163						1.22171	0.144354						0.962845	0.279616
	0.944388	0.054193						0.778287	0.404357						1.08041	0.213081
	0.788815	0.063595						0.860751	0.284706						1.11209	0.470497
	0.369256	0.048126						0.669224	0.333641						0.897701	0.234213
	1.61395	0.087111						1.35818	0.508483						0.990207	1.71488
	0.652809	0.065558						0.794537	0.284924							0.576249
	1.57517	0.331785						1.31731	0.634959
	1.19146	0.11533						1.60426	0.512308
	0.847307	1.21943						0.778973	1.54433
	0.378386	0.212996						0.533686	0.815407
	0.948232							0.906729
	1.63461							1.17635
	1.14137							0.674671
	0.896936							1.33655
	0.961698							0.988774
Statistical Test							Statistical Test							Statistical Test
Tukey's multiple comparisons test	Mean Diff.	95.00% CI of diff.	Below threshold?	Summary	Adjusted P Value		Tukey's multiple comparisons test	Mean Diff.	95.00% CI of diff.	Below threshold?	Summary	Adjusted P Value		Tukey's multiple comparisons test	Mean Diff.	95.00% CI of diff.	Below threshold?	Summary	Adjusted P Value
WT no ABX vs. WT + ABX	0.835	0.6842 to 0.9859	Yes	****	<0.0001		WT no ABX vs. WT + ABX	0.5799	0.4410 to 0.7189	Yes	****	<0.0001		WT no ABX vs. WT + ABX	0.6101	0.4891 to 0.7310	Yes	****	<0.0001
WT no ABX vs. Ifnlr1-/-no ABX	0.7379	0.5466 to 0.9293	Yes	****	<0.0001		WT no ABX vs. Ifnlr1-/- no ABX	0.352	0.1758 to 0.5282	Yes	****	<0.0001		WT no ABX vs. Ifnlr1-/- no ABX	0.7477	0.5989 to 0.8964	Yes	****	<0.0001
WT no ABX vs. Ifnlr1-/- + ABX	0.8499	0.6751 to 1.025	Yes	****	<0.0001		WT no ABX vs. Ifnlr1-/- + ABX	0.5306	0.3697 to 0.6916	Yes	****	<0.0001		WT no ABX vs. Ifnlr1-/- + ABX	0.6855	0.5490 to 0.8221	Yes	****	<0.0001
WT + ABX vs. Ifnlr1-/-no ABX	-0.09708	-0.2907 to 0.09651	No	ns	0.5643		WT + ABX vs. Ifnlr1-/- no ABX	-0.2279	-0.4062 to -0.04962	Yes	**	0.006		WT + ABX vs. Ifnlr1-/- no ABX	0.1376	-0.01078 to 0.2859	No	ns	0.0798
WT + ABX vs. Ifnlr1-/- + ABX	0.01485	-0.1624 to 0.1920	No	ns	0.9964		WT + ABX vs. Ifnlr1-/- + ABX	-0.04929	-0.2125 to 0.1139	No	ns	0.8623		WT + ABX vs. Ifnlr1-/- + ABX	0.07544	-0.06063 to 0.2115	No	ns	0.4776
Ifnlr1-/-no ABX vs. Ifnlr1-/- + ABX	0.1119	-0.1008 to 0.3246	No	ns	0.5238		Ifnlr1-/- no ABX vs. Ifnlr1-/- + ABX	0.1786	-0.01729 to 0.3745	No	ns	0.0878		Ifnlr1-/- no ABX vs. Ifnlr1-/- + ABX	-0.06214	-0.2234 to 0.09916	No	ns	0.7502

## Sheet: Figure 2B
Figure 2B - Source Data
Description: Gene expression of ISGs in colon tissue normalized to WT (no ABX) mice.
Ifit1							Stat1							Oas1a
Genotype	WT	WT	Ifnlr1 -/-	Ifnlr1 -/-			Genotype	WT	WT	Ifnlr1 -/-	Ifnlr1 -/-			Genotype	WT	WT	Ifnlr1 -/-	Ifnlr1 -/-
ABX	-	+	-	+			ABX	-	+	-	+			ABX	-	+	-	+
	0.647727	0.27682	0.479264	0.409793				0.863181	0.421443	0.7291	0.840017				0.647727	0.27682	0.479264	0.409793
	1.35227	0.19685	0.16103	0.112483				1.13682	0.465542	0.339164	0.508178				1.35227	0.19685	0.16103	0.112483
	0.24952	0.462479	0.326403	0.039674				0.421229	1.09278	0.486676	0.500074				0.527027	0.462479	0.326403	0.039674
	1.75048	0.320729	0.095705	0.173806				1.57877	0.693884	0.225086	0.585552				1.47297	0.556588	0.347925	0.41399
	0.745286	0.965631	0.170098	0.184493				1.02754	1.03056	0.531882	0.717596				0.771123	0.939325	0.495139	0.465882
	0.745521	0.050732	0.153706	0.089902				0.972461	0.239856	0.428469	0.49206				0.780594	0.315036	0.455284	0.2886
	1.13083	0.236047	0.391132	0.272632				1.10608	0.53238	0.346779	1.18159				1.04427	0.657783	0.586265	0.740629
	0.646015	0.13013	0.335669	0.159997				0.713236	0.364079	0.504097	0.49615				0.921588	0.455189	0.444048	0.342129
	1.07839	0.111772	0.34801	0.22276				1.16003	0.492808	0.948498	0.688202				1.47556	0.44514	0.56994	0.456509
	2.05207	0.40591	0.173643	0.126285				1.10717	0.621803	0.755112	0.606502				1.07682	0.649918	0.676458	0.33464
	0.601885	0.396795	0.146956	0.102914				0.913483	0.681728	0.483312	0.699257				0.930038	0.873515	0.264838	0.514364
	0.990439	0.420589	0.419332	0.144064				1.12635	1.66875	0.321092	0.229117				1.1448	0.744041	0.396201	0.575904
	1.00956	0.085488	0.276995	0.188523				0.873654	0.447997	0.533044	0.319593				0.855198	0.551291	0.421144	0.657392
	1.03864	0.318136	0.207589	0.147602				0.473764	0.85256	0.68261	0.286854				0.79159	0.638043	1.37133	0.554637
	0.734071	0.066184	0.563868	0.400659				0.892193	0.449103	0.783896	0.523242				0.890548	0.259784	0.41118	0.460775
	1.23339	0.250792	0.388235	0.155242				1.60804	0.474166	0.855614	0.224518				1.49946	0.448212	0.763001	0.209203
	0.993896	0.137187	0.59534	0.466623				1.026	0.560395	1.05178	1.09394				0.818398	0.274538	0.747027	0.292688
	0.688023	0.087448	0.40036	0.276347				1.20212	0.458957	0.744672	0.944904				0.87811	0.192843	0.528583	0.454852
	1.13895	0.197782	0.486119	0.504047				0.722756	0.956708	0.836564	0.983962				1.34703	0.549971	0.539592	0.291225
	1.17303	0.185504	0.378713	0.2133				1.07513	0.518167	0.660649	0.696602				0.774863	0.405858	0.632288	0.499129
	0.703121	0.062207	0.187135	0.013161				0.894198	0.323813	0.56504	0.13349				1.33486	0.195897	0.541763	0.427626
	1.29688	0.263765	0.129576	0.021495				1.1058	0.704613	0.586732	0.233561				0.665139	0.459322	0.478173	0.367584
	1.29137	0.233978	0.214867	0.053054				1.14974	0.812742	0.631321	0.504989				0.776564	0.733682	0.583781	0.485728
	0.708627	0.236994	0.11055	0.133466				0.85026	0.411167	0.453591	0.427818				1.41414	0.223563	0.594441	0.46499
	1.47972	1.26482	0.183139	0.236769				1.21555	0.346575	0.562973	0.61304				0.782092	0.484878	0.434327	0.508378
	0.559565	0.608409	0.434482	0.264502				0.784449	0.927288	0.962914	0.714154				1.24835	0.335482	0.731024	0.503072
	0.960719	0.355336	0.291671	0.294237				0.644744	0.570276	0.64128	0.575961				0.778859	0.440165	0.440118	0.439016
	0.936853	0.079914	0.362771	0.342751				1.13206	0.339241	1.11833	0.843824				1.07258	0.150536	0.579884	0.751772
	1.20003	0.297506	0.996821	0.233649				1.19686	0.702376	1.36538	0.685699				0.924168	0.814097
	0.931152	0.236656	0.129261	0.290153				1.09742	0.708686	0.671024	0.787541				0.925502	0.772873
	1.3255	0.506502	0.136088	0.378344				0.928918	0.744743	0.594034	0.788073				1.01097	0.580862
	0.606471	0.076808		0.16215				1.00028	0.278456		0.495137				1.06678	2.23433
	0.965031	0.696471		0.369437				0.800509	0.933484		0.733735				0.840525	0.230393
	0.980472	0.816141						0.810129	1.34286						0.807617	1.08765
	1.04664	0.70091						1.54674	0.914967						1.35186	0.691168
	1.31419	0.434531						0.842345	0.843139						1.17395	1.10437
	0.693663	0.51261						1.08019	0.815347						1.18891	0.902745
	1.00508	0.753215						1.07147	1.05984						0.685547	0.604719
	1.25224	0.450474						0.921412	0.987308						0.688965	0.58177
	0.828688	0.113862						0.98806	0.498679						1.26263	0.673512
	0.901563	0.181738						0.938865	0.476923						1.08458	0.340927
	1.01243	0.112323						0.631137	0.177881						0.915417	0.369313
	1.28231	0.23773						1.00189	0.784998						1.12343	0.392222
	0.591923	0.426313						1.36697	0.770622						0.849622	0.436896
	1.12577	0.070027						0.97095	0.229832						1.02695	0.861691
	1.00315	0.030118						1.02905	0.316504						1.1544	0.359473
	0.996845	0.084785						1.01127	0.565615						0.845599	0.435943
	1.14474	0.053808						0.981475	0.350195						1.27435	0.437184
	0.878687	0.458489						1.00726	0.816215						0.791387	0.423625
	0.976574	0.316397						1.04618	0.826129						0.895487	0.477782
	0.797518	0.56047						0.953819	1.15612						1.03108	0.566413
	1.20248	0.418862						1.04881	0.860827						1.0077	0.202467
	0.90398	0.340658						0.808273	0.76122						1.08423	0.742324
	0.766199	0.338537						0.947346	0.63887						1.23695	0.681811
	1.01205	0.125053						1.12994	0.695452						0.733282	0.197779
	1.13095	0.065562						1.06563	0.255171						1.03294	0.472098
	1.18682	0.255523						0.484737	1.27964						0.912601	1.05832
	0.339751	0.414661						1.1517	0.95543
	0.700175	0.070687						0.776135	0.188663
	1.03366	0.228522						1.54402	0.574886
	2.3061	0.471021						1.04341	1.22458
	0.620319
Statistical Test							Statistical Test							Statistical Test
Tukey's multiple comparisons test	Mean Diff.	95.00% CI of diff.	Below threshold?	Summary	Adjusted P Value		Tukey's multiple comparisons test	Mean Diff.	95.00% CI of diff.	Below threshold?	Summary	Adjusted P Value		Tukey's multiple comparisons test	Mean Diff.	95.00% CI of diff.	Below threshold?	Summary	Adjusted P Value
WT no ABX vs. WT + ABX	0.6842	0.5614 to 0.8070	Yes	****	<0.0001		WT no ABX vs. WT + ABX	0.3247	0.1982 to 0.4511	Yes	****	<0.0001		WT no ABX vs. WT + ABX	0.4447	0.3186 to 0.5709	Yes	****	<0.0001
WT no ABX vs. Ifnlr1-/-no ABX	0.6879	0.5381 to 0.8377	Yes	****	<0.0001		WT no ABX vs. Ifnlr1-/-no ABX	0.3419	0.1878 to 0.4960	Yes	****	<0.0001		WT no ABX vs. Ifnlr1-/-no ABX	0.4643	0.3089 to 0.6197	Yes	****	<0.0001
WT no ABX vs. Ifnlr1-/-+ ABX	0.7823	0.6355 to 0.9290	Yes	****	<0.0001		WT no ABX vs. Ifnlr1-/-+ ABX	0.3892	0.2383 to 0.5402	Yes	****	<0.0001		WT no ABX vs. Ifnlr1-/-+ ABX	0.5692	0.4138 to 0.7246	Yes	****	<0.0001
WT + ABX vs. Ifnlr1-/-no ABX	0.003745	-0.1465 to 0.1540	No	ns	>0.9999		WT + ABX vs. Ifnlr1-/-no ABX	0.01724	-0.1368 to 0.1713	No	ns	0.9915		WT + ABX vs. Ifnlr1-/-no ABX	0.01956	-0.1359 to 0.1750	No	ns	0.9879
WT + ABX vs. Ifnlr1-/-+ ABX	0.09812	-0.04904 to 0.2453	No	ns	0.3118		WT + ABX vs. Ifnlr1-/-+ ABX	0.06457	-0.08636 to 0.2155	No	ns	0.6843		WT + ABX vs. Ifnlr1-/-+ ABX	0.1245	-0.03093 to 0.2799	No	ns	0.1644
Ifnlr1-/-no ABX vs. Ifnlr1-/-+ ABX	0.09438	-0.07596 to 0.2647	No	ns	0.4783		Ifnlr1-/-no ABX vs. Ifnlr1-/-+ ABX	0.04733	-0.1274 to 0.2220	No	ns	0.896		Ifnlr1-/-no ABX vs. Ifnlr1-/-+ ABX	0.1049	-0.07506 to 0.2849	No	ns	0.4321

## Sheet: Figure 2C
Figure 2C - Source Data
Description: Gene expression of ISGs in mLN and spleen normalized to WT (no ABX) mice.
Ifit1											Stat1											Oas1a
Genotype	WT	WT	Ifnlr1 -/-	Ifnlr1 -/-	WT	WT	Ifnlr1 -/-	Ifnlr1 -/-			Genotype	WT	WT	Ifnlr1 -/-	Ifnlr1 -/-	WT	WT	Ifnlr1 -/-	Ifnlr1 -/-			Genotype	WT	WT	Ifnlr1 -/-	Ifnlr1 -/-	WT	WT	Ifnlr1 -/-	Ifnlr1 -/-
ABX	-	+	-	+	-	+	-	+			ABX	-	+	-	+	-	+	-	+			ABX	-	+	-	+	-	+	-	+
Tissue	mLN	mLN	mLN	mLN	spleen	spleen	spleen	spleen			Tissue	mLN	mLN	mLN	mLN	spleen	spleen	spleen	spleen			Tissue	mLN	mLN	mLN	mLN	spleen	spleen	spleen	spleen
	1.03325	4.26651	2.18059	3.03163	0.307752	1.2833	2.80753	1.66855				1.14528	0.988151	1.02235	1.00945	WT no ABX	WT + ABX	Ifnlr1-/-no ABX	Ifnlr1-/- + ABX				1.03325	4.26651	2.18059	3.03163	0.307752	1.2833	2.80753	1.66855
	0.966752	1.21328	0.425663	0.48677	1.69225	1.30837	1.02094	0.69096				0.854725	0.566386	0.426416	0.445738	0.88827	1.06848	2.1263	0.330255				0.966752	1.21328	0.425663	0.48677	1.69225	0.658927	0.500626	0.69096
	0.777954	1.03337	0.398074	0.515397	0.716733	0.617515	0.917537	1.22815				0.993318	0.78528	1.20707	0.667629	1.11173	0.770915	0.64972	0.599684				1.20713	1.03337	0.819596	0.515397	0.981034	0.516009	0.527323	0.754746
	1.22203	9.05605	0.420424	0.329146	1.28327	1.58362	1.2509	0.266187				1.00668	1.75175	1.23388	1.59796	0.659517	0.813932	0.763089	1.34531				0.792865	2.87482	0.460418	0.267477	1.01896	0.889662	0.253904	0.493057
	0.874846	3.37475	1.22521	0.405076	0.999999	1.03358	1.33562	0.628992				1.00835	1.63222	1.54476	2.20604	1.34048	0.861265	0.508935	0.35442				1.03031	1.97685	1.15937	0.286675	1	0.871877	0.233344	0.868195
	1.12515	2.12186	0.345961	0.262282	0.894583	1.63556	1.63016	0.269551				0.991644	1.92602	0.433417	0.471877	1	0.520646	0.57353	1.01642				0.969688	1.13799	0.637606	0.155607	1.58174	0.55667	0.475039	0.325667
	0.959619	0.653481	1.32097	0.204969	0.539863	0.273482	0.200998					1.96554	1.92035	0.589762	0.843079	1.06139	0.637974	0.595912	0.217293				1.05797	0.713866	0.663882	0.11087	0.994894	0.554632	0.306928
	0.94028	0.616611	0.493848	0.690587	1.67992	0.28794	0.162974					0.835468	2.08932	2.94064	1.49063	0.950833	0.696762	0.499006					0.460443	0.502379	0.818572	0.40538	0.896998
	0.785654	0.405684	0.268117	0.927706	1.02434	0.325393	0.301216					0.102475	0.509324	2.18676	1.01493	1.23573							1.2802	0.125369	0.338402	1.15863	0.933538
	1.31445	0.713509	0.572278	1.27984	0.861286		0.142364					1.09652	1.81977	0.985921	1.16117	0.844289							1.20139	0.324411	0.69372	1.0108	0.592829
	0.968953	1.16677	0.373781	0.729015	1.06009							1.14021	0.47519	0.883283	0.643272	0.907766							0.947307	0.998475	0.955457	0.768429	1.01401
	0.7272	0.979155	0.903268	0.631951	0.939911							0.872827	0.419485	1.27972	0.572514	1.01161							0.940647	1.14817	1.13178	0.736801	0.985995
	1.30385	1.43554	0.589631	0.831206	1.00264							0.98696	1.06802	2.14774	0.570335	0.988386							1.11204	1.03131	1.11042	0.305986
	0.554432	0.450651	0.565279	1.25413	0.997363							0.99192	0.671446	1.94901	1.02469								1.00349	0.620316	1.7024	0.55436
	0.552523	0.218273		0.815029								0.964797	0.915493	1.77175	1.02428								0.944388	0.40086	0.942277	0.471378
	1.93693	0.317766		0.75582								0.878866	0.739703	1.16831	0.907964								1.26053	0.527888	0.419939	0.598289
	0.378938	1.15706		2.11947								0.886828	0.997057	1.3175	1.73741								0.633545	1.05161	0.347205	1.11336
	1.57718	2.14003										1.27759	1.07618										1.15804	0.658269
	1.66152	8.89889										1.48991	1.33731										1.11546	1.34896
	0.338482	5.45755										0.510092	1.78497										0.884537	3.34043
	1.09508	4.149										1.15927	1.88657										1.11192	1.62911
	0.904922	3.60394										0.840731	1.79039										0.888076	2.12277
	0.884434	1.43058										0.847233	1.10192										0.76714	1.61541
	1.11557	1.45196										1.15277	0.701227										1.23286	1.10309
	0.109409	0.778702										1.06828	0.380156										1.30898	2.61447
	2.02939	6.22591										0.931715	0.213521										0.691017	0.300262
	0.861202	1.03401										0.350048	0.885147										0.13014	0.938354
	1.03727	0.700859										1.34403	1.50998										0.710138	4.92719
	1.8982	1.95922										1.30593	0.933813										2.15972	0.449569
	0.716626	0.423256										0.981563	1.02923										1.018	0.6615
	0.347907	0.258025										1.07382	1.19698										1.21926	2.26112
	1.40158	1.28415										1.04468	1.09318										0.762739	0.705857
	1.06331	4.63809										0.899939	0.748372										0.91352	1.21074
	0.535111	0.609469										0.990931	0.632549										1.30298	0.657128
	1.01578	2.15845										1.02528	1.43744										0.917065	0.397873
	0.984223											0.983792	1.06942										0.866433	0.688839
												0.969339	0.701237										1.14811	1.99185
												1.03066											0.85189
Statistical Test											Statistical Test											Statistical Test
Dunnett's multiple comparisons test	Mean Diff.	95.00% CI of diff.	Below threshold?	Summary	Adjusted P Value						Dunnett's multiple comparisons test	Mean Diff.	95.00% CI of diff.	Below threshold?	Summary	Adjusted P Value						Dunnett's multiple comparisons test	Mean Diff.	95.00% CI of diff.	Below threshold?	Summary	Adjusted P Value
WT mLN no ABX vs. WT mLN + ABX	-1.182	-2.002 to -0.3628	Yes	***	0.0009						WT mLN no ABX vs. WT mLN + ABX	-0.1023	-0.3806 to 0.1760	No	ns	0.9474						WT mLN no ABX vs. WT mLN + ABX	-0.3397	-0.7679 to 0.08840	No	ns	0.21
WT mLN no ABX vs. Ifnlr1-/- mLN no ABX	0.2798	-0.8077 to 1.367	No	ns	0.9917						WT mLN no ABX vs. Ifnlr1-/- mLN no ABX	-0.3581	-0.7097 to -0.006557	Yes	*	0.0432						WT mLN no ABX vs. Ifnlr1-/- mLN no ABX	0.129	-0.4119 to 0.6699	No	ns	0.9966
WT mLN no ABX vs. Ifnlr1-/- mLN + ABX	0.1018	-0.9143 to 1.118	No	ns	0.9997						WT mLN no ABX vs. Ifnlr1-/- mLN + ABX	-0.02288	-0.3745 to 0.3287	No	ns	0.9998						WT mLN no ABX vs. Ifnlr1-/- mLN + ABX	0.2954	-0.2455 to 0.8363	No	ns	0.6674
WT mLN no ABX vs. WT spleen no ABX	-1.19e-07	-1.087 to 1.087	No	ns	>0.9999						WT mLN no ABX vs. WT spleen no ABX	-8.333e-08	-0.3990 to 0.3990	No	ns	>0.9999						WT mLN no ABX vs. WT spleen no ABX	4.254e-07	-0.6138 to 0.6138	No	ns	>0.9999
WT mLN no ABX vs. WT spleen + ABX	0.07236	-1.214 to 1.359	No	ns	0.9998						WT mLN no ABX vs. WT spleen + ABX	0.2329	-0.2627 to 0.7284	No	ns	0.8159						WT mLN no ABX vs. WT spleen + ABX	0.2384	-0.5240 to 1.001	No	ns	0.9807
WT mLN no ABX vs. Ifnlr1-/- spleen no ABX	0.02298	-1.211 to 1.257	No	ns	>0.9999						WT mLN no ABX vs. Ifnlr1-/- spleen no ABX	0.1834	-0.3122 to 0.6789	No	ns	0.9454						WT mLN no ABX vs. Ifnlr1-/- spleen no ABX	0.2708	-0.4917 to 1.033	No	ns	0.9569
WT mLN no ABX vs. Ifnlr1-/- spleen + ABX	0.2079	-1.314 to 1.730	No	ns	0.9996						WT mLN no ABX vs. Ifnlr1-/- spleen + ABX	0.3561	-0.1732 to 0.8854	No	ns	0.4036						WT mLN no ABX vs. Ifnlr1-/- spleen + ABX	0.1998	-0.6145 to 1.014	No	ns	0.9963
