# Supplementary material for: Homeostatic interferon-lambda response to bacterial microbiota stimulates preemptive antiviral defense within discrete pockets of intestinal epithelium
Source: eLife. 2022 Feb 9;11:e74072. doi: 10.7554/eLife.74072 (PMC8853662; doi:10.7554/eLife.74072)
Supplement: Figure 3—source data 1. [file elife-74072-fig3-data1.xlsx]

## Sheet: Figure 3A
Figure 3A - Source Data
Description: Ifit1 expression in the ileum and colon tissue of indicated mice normalized to WT mice with no ABX
Ileum									Colon
Genotype	WT	WT	Trif -/-	Trif -/-	Myd88 -/-	Myd88 -/-			Genotype	WT	WT	Trif -/-	Trif -/-	Myd88 -/-	Myd88 -/-
ABX	-	+	-	+	-	+			ABX	-	+	-	+	-	+
	1.02049	0.021078	0.527465	0.124987	0.304252	0.008208				0.24952	0.320729	0.808052	0.036863	0.688958	0.06666
	0.979507	0.088131	1.21053	0.193879	0.633811	0.016389				1.75048	0.965631	0.593495	0.134886	1.4386	0.058572
	0.908674	0.092603	0.21967	0.084066	0.272658	0.013474				0.745286	0.396795	1.03427	0.038253	1.16285	0.025203
	1.09133	0.117569	0.903529	0.191705	0.161603	0.038535				0.745521	0.420589	2.0667	0.209021	0.897163	0.263075
	0.384448	0.11961	1.04395	0.099643	0.182471	0.030648				0.990439	0.085488	1.82927	0.204884	0.757796	0.067836
	0.936734	0.240969	0.533889	0.189801	0.107722					1.00956	0.318136	1.51433	0.077253	0.339384
	0.941005	0.121867	0.783014	0.115966	0.144824					1.03864	0.066184	1.99903	0.091672	0.362112
	0.651796	0.327028	2.19254	0.41949						0.734071	0.250792	0.544801	0.076511
	2.07266	0.043674	2.47822	0.158625						1.23339	0.137187	0.598396	0.119069
	1.39344	0.211979	0.767143	0.149892						0.993896	0.087448	0.922497	0.066949
	0.633473	0.063554	0.327458	0.04299						0.688023	0.197782	1.07685	0.151557
	0.973089	0.378579	0.582287	0.114625						1.13895	0.185504	1.11176	0.110895
	0.657358	0.113084	0.571228	0.045						1.17303	0.062207	1.10593	0.104325
	1.71803	0.103485	0.63986	0.059574						0.936853	0.079914	1.07694	0.248049
	1.34507	0.216505		0.085227						1.20003	0.297506	0.737678	0.349936
	0.500099	0.093708								0.931152	0.236656	1.37738	0.207335
	0.779441	0.016525								1.3255	0.506502	0.896251	0.209486
	1.50988	0.015202								0.606471	0.076808		0.365561
	0.551492	0.031169								0.965031	0.696471
	0.938632									0.980472	0.816141
										1.04664	0.70091
										1.31419	0.434531
										0.693663	0.51261
										1.00508	0.753215
										1.25224	0.450474
										0.828688	0.113862
										0.901563	0.070027
										1.01243	0.030118
										1.14474	0.084785
										0.878687
										0.976574
Statistical Test									Statistical Test
Dunnett's multiple comparisons test	Mean Diff.	95.00% CI of diff.	Below threshold?	Summary	Adjusted P Value				Dunnett's multiple comparisons test	Mean Diff.	95.00% CI of diff.	Below threshold?	Summary	Adjusted P Value
WT no ABX vs. WT + ABX	0.8722	0.5713 to 1.173	Yes	****	<0.0001				WT no ABX vs. WT + ABX	0.661	0.4622 to 0.8597	Yes	****	<0.0001
WT no ABX vs. Trif-/-no ABX	0.08642	-0.2408 to 0.4137	No	ns	0.9519				WT no ABX vs. Trif-/-no ABX	-0.1513	-0.3835 to 0.08083	No	ns	0.3559
WT no ABX vs. Trif-/-+ ABX	0.861	0.5402 to 1.182	Yes	****	<0.0001				WT no ABX vs. Trif-/-+ ABX	0.8279	0.5999 to 1.056	Yes	****	<0.0001
WT no ABX vs. Myd88-/-no ABX	0.7411	0.3287 to 1.154	Yes	****	<0.0001				WT no ABX vs. Myd88-/-no ABX	0.1769	-0.1450 to 0.4988	No	ns	0.5321
WT no ABX vs. Myd88-/- + ABX	0.9779	0.5083 to 1.447	Yes	****	<0.0001				WT no ABX vs. Myd88-/-+ ABX	0.8873	0.5166 to 1.258	Yes	****	<0.0001

## Sheet: Figure 3B
Figure 3B - Source Data
Description: Ifit1 expression in the ileum and colon tissue of indicated mice normalized to WT mice with no ABX
Ileum									Colon
Genotype	WT	WT	Irf3 -/-	Irf3 -/-	Irf7 -/-	Irf7 -/-			Genotype	WT	WT	Irf3 -/-	Irf3 -/-	Irf7 -/-	Irf7 -/-
ABX	-	+	-	+	-	+			ABX	-	+	-	+	-	+
	0.770294	0.026128	0.608216	0.370153	0.978548	0.139628				1.13083	0.050732	0.363639	0.174042	0.988041	0.515358
	0.807228	0.08522	0.925198	0.03716	0.29298	0.241418				0.646015	0.236047	0.495517	0.037137	1.09923	0.366299
	1.48728	0.05866	1.40227	0.049099	0.24141	0.157052				1.07839	0.13013	2.06814	0.113443	1.27797	0.269035
	1.27756	0.06134	0.704753	0.021179	0.769861	0.05978				2.05207	0.111772	0.737382	0.0545732	0.973024	0.852959
	0.908674	0.245442	1.67905	0.021231	0.261775	0.042689				0.601885	0.40591	0.441563	0.305991	0.211647	0.20594
	1.09133	0.021078	1.68554	0.24807	0.174702	0.051527				0.990439	0.396795	0.75292	0.404896	0.484747	0.24014
	0.384448	0.088131	0.25475	0.605562	0.190969	0.046026				1.00956	0.420589	2.06203	0.201238	0.561269	0.041052
	0.936734	0.092603	0.352213	0.164929	0.08712	0.039408				1.29137	0.085488	1.75595	0.177046	0.630662	0.054955
	0.941005	0.117569	0.300112	0.242182	0.55882	0.032446				0.708627	0.236994	0.346853	0.215636	0.495317	0.223113
	0.651796	0.11961		0.125762	0.369099	0.084273				1.47972	1.26482	0.504856		0.525855	0.162403
	2.07266	0.240969		0.251466	2.29545	0.094588				0.559565	0.608409	0.427254		0.465946	0.096308
	0.879806	0.121867			0.554723	0.043188				0.960719	0.355336			0.646162	0.194614
	0.980428	0.327028			1.68032	0.455727				0.965031	0.696471			0.373832	0.233853
	2.78938	0.105194			0.36288	0.159202				0.980472	0.816141			0.261147	0.086902
	0.340665	0.151844			0.704136	0.138201				1.04664	0.70091				0.10819
	0.853272	0.096726				0.219098				1.31419	0.434531				0.080129
	0.574717	0.100756				0.106939				0.693663	0.51261				0.060912
	0.679585	0.378579				0.093576				1.28231	0.181738				0.068971
	0.351491	0.113084				0.035481				0.591923	0.112323				0.065395
	0.488491	0.103485				0.027214				1.12577	0.23773
	2.06216	0.216505				0.012959				1.00315	0.426313
	0.657358	0.093708								0.996845	0.070027
	1.71803	0.307321								1.14474	0.030118
	1.34507	0.26822								0.878687	0.084785
	0.500099	0.090559								0.976574
	0.779441	0.158808
	0.744131	0.016525
	1.97056	0.015202
	1.19555	0.031169
	0.583461
	0.506296
	1.50988
	0.551492
	0.938632
Statistical Test									Statistical Test
Dunnett's multiple comparisons test	Mean Diff.	95.00% CI of diff.	Below threshold?	Summary	Adjusted P Value				Dunnett's multiple comparisons test	Mean Diff.	95.00% CI of diff.	Below threshold?	Summary	Adjusted P Value
WT no ABX vs. WT + ABX	0.8768	0.6047 to 1.149	Yes	****	<0.0001				WT no ABX vs. WT + ABX	0.6618	0.4054 to 0.9181	Yes	****	<0.0001
WT no ABX vs. Irf3-/- no ABX	0.1306	-0.2730 to 0.5341	No	ns	0.9032				WT no ABX vs. Irf3-/- no ABX	0.1153	-0.2092 to 0.4398	No	ns	0.8563
WT no ABX vs. Irf3-/- + ABX	0.8154	0.4420 to 1.189	Yes	****	<0.0001				WT no ABX vs. Irf3-/- + ABX	0.8333	0.4846 to 1.182	Yes	****	<0.0001
WT no ABX vs. Irf7-/- no ABX	0.3748	0.04117 to 0.7085	Yes	*	0.0208				WT no ABX vs. Irf7-/- no ABX	0.3779	0.07848 to 0.6773	Yes	**	0.0073
WT no ABX vs. Irf7-/- + ABX	0.9011	0.6023 to 1.200	Yes	****	<0.0001				WT no ABX vs. Irf7-/- + ABX	0.8137	0.5407 to 1.087	Yes	****	<0.0001

## Sheet: Figure 3C
Figure 3C - Source Data
Description: Ifit1 expression in the ileum and colon tissue of indicated mice normalized to WT mice with no ABX
Ileum									Colon
Genotype	WT	WT	Ifnar1 -/-	Ifnar1 -/-	Stat1 -/-	Stat1 -/-			Genotype	WT	WT	Ifnar1 -/-	Ifnar1 -/-	Stat1 -/-	Stat1 -/-
ABX	-	+	-	+	-	+			ABX	-	+	-	+	-	+
	0.605082	0.060695	0.186273	0.095189	0.083295	0.028389				0.647727	0.27682	0.701857	0.24816	0.622597	0.213035
	1.39492	0.034838	0.600013	0.241952	0.195356	0.04334				1.35227	0.19685	0.552441	0.476658	0.573726	0.16544
	1.02049	0.280308	1.5241	0.266441	0.104663	0.030065				0.24952	0.462479	0.555682	0.043258	0.504118	0.32197
	0.979507	0.030886	1.0367	0.143407	0.083563	0.032228				1.75048	0.320729	0.264195	0.25195	0.22456	0.258771
	1.31538	0.048027	0.454225	0.854048	0.21383	0.053547				0.745286	0.965631	0.540756	0.474663	0.251457	0.060657
	0.342259	0.045423	0.364148	0.022294	0.121392	0.027359				0.745521	0.396795	1.13782	0.247844	0.419546	0.129167
	0.908674	0.021078	1.41316	0.329325	0.20535	0.051786				0.990439	0.420589	0.71806	0.354606	0.156631	0.098178
	1.09133	0.088131	1.38992	0.214969	0.070009	0.046708				1.00956	0.085488	0.579778	0.096236	0.174961	0.084229
	0.384448	0.092603	1.67417	0.368428	0.045894	0.024806				1.03864	0.318136	1.37514	0.175358	0.256302	0.156872
	0.936734	0.117569	1.74339	0.319089	0.025222	0.049535				0.734071	0.066184	1.04471	0.277018	0.11576	0.231359
	0.941005	0.11961	0.797069	0.636544	0.025665	0.019265				1.23339	0.250792	0.789869	0.233732	0.05178	0.711514
	0.651796	0.240969	0.71745	0.032397	0.019601	0.022132				0.993896	0.137187	1.22709	0.392794	0.046727	0.065099
	2.07266	0.121867	1.02822	0.165468	0.029829	0.018				0.688023	0.087448	1.16754	0.100054	0.064365	0.09833
	0.879806	0.327028	0.447403	1.14354	0.156964	0.01262				1.13895	0.197782	1.22888	0.312981
	0.980428	0.105194	0.316492	0.9759	0.090354	0.0220172				1.17303	0.185504	3.12492	0.256408
	2.78938	0.151844	0.625154	0.035219	0.0713719	0.0838619				0.703121	0.062207	2.53977	0.491722
	0.340665	0.096726	1.35158	0.024623		0.268971				1.29688	0.263765	3.39708	0.632587
	0.853272	0.100756	0.661196	0.055145		0.14848				1.29137	0.233978	2.10659	0.139305
	0.574717	0.107264	0.735622	0.415764						0.708627	0.236994	0.654735	0.321855
	0.679585	0.108522	1.00059							1.47972	1.26482	0.936522	0.048484
	0.351491	0.374227	0.852069							0.559565	0.608409	0.690323
	0.488491	0.055119	0.570694							0.960719	0.355336	1.28103
	2.06216	1.69466	1.25319							0.936853	0.079914	0.424756
	1.54147	0.132621	0.439812							1.20003	0.297506	0.418927
	0.885822	0.063201	0.56105							0.931152	0.236656	0.731777
	0.572703	0.11764	0.06462							1.3255	0.506502	0.408515
	1.01805	0.112073	0.968826							0.606471	0.076808	0.433299
	0.981946	0.211839	0.132968							1.00508	0.753215	1.15174
	0.307669	0.109979	0.111603							1.25224	0.450474	1.11557
	1.05815	0.230088								0.828688	0.113862	0.036541
	1.17904	0.14023								0.901563	0.316397	1.39047
	1.10983	0.101295								1.01243	0.56047	1.4261
	1.34531	0.33726								0.90398	0.418862
	0.788815	0.281842								0.766199	0.340658
	0.369256	0.105939								1.01205	0.338537
	1.61395	0.259663								1.13095
	0.652809	1.52784								1.18682
	1.57517	0.149326
	1.23511	0.858443
	0.35854	0.156632
	0.889835	0.00203674
	2.31758	0.0549804
	1.21049	0.520555
	0.142909	1.19085
	0.201502	0.538986
	0.0276372	0.166036
	0.0990331	1.05601
	1.16435
	3.35301
	0.784868
	0.328057
	1.88708
Statistical Test									Statistical Test
Dunnett's multiple comparisons test	Mean Diff.	95.00% CI of diff.	Below threshold?	Summary	Adjusted P Value				Dunnett's multiple comparisons test	Mean Diff.	95.00% CI of diff.	Below threshold?	Summary	Adjusted P Value
WT no ABX vs. WT + ABX	0.7198	0.4780 to 0.9615	Yes	****	<0.0001				WT no ABX vs. WT + ABX	0.6467	0.3931 to 0.9003	Yes	****	<0.0001
WT no ABX vs. Ifnar1-/- no ABX	0.1993	-0.07909 to 0.4777	No	ns	0.2668				WT no ABX vs. Ifnar1-/- no ABX	-0.08103	-0.3406 to 0.1786	No	ns	0.9121
WT no ABX vs. Ifnar1-/-+ABX	0.6595	0.3375 to 0.9815	Yes	****	<0.0001				WT no ABX vs. Ifnar1-/- + ABX	0.7075	0.4090 to 1.006	Yes	****	<0.0001
WT no ABX vs. Stat1-/-no ABX	0.8968	0.5533 to 1.240	Yes	****	<0.0001				WT no ABX vs. Stat1-/- no ABX	0.7199	0.3732 to 1.067	Yes	****	<0.0001
WT no ABX vs. Stat1-/-+ ABX	0.9385	0.6100 to 1.267	Yes	****	<0.0001				WT no ABX vs. Stat1-/- + ABX	0.7867	0.4399 to 1.133	Yes	****	<0.0001

## Sheet: Figure 3D
Figure 3D - Source Data
Description: Ifit1 expression in ileum tissue of indicated mice normalized to het/het mice
Ileum
Ifnar1	het	KO	het	KO
Ifnlr1	het	het	KO	KO
	0.478441	0.819469	0.407176	0.536304
	2.14537	0.9917	0.372542	0.839099
	1.57067	0.966624	0.462398	0.597912
	1.20582	0.58171	0.584174	0.273083
	0.135457	0.194332	0.285913	0.121491
	0.464242	0.828766	0.459736	0.311067
	1.15227	0.301377	0.442558	0.209611
	0.847731	0.664848		0.195287
Statistical Test
Tukey's multiple comparisons test	Mean Diff.	95.00% CI of diff.	Below threshold?	Summary	Adjusted P Value
Dhet vs. ARKO	0.3314	-0.2031 to 0.8659	No	ns	0.345
Dhet vs. LRKO	0.5694	0.01605 to 1.123	Yes	*	0.042
Dhet vs. DKO	0.6145	0.07997 to 1.149	Yes	*	0.0197
ARKO vs. LRKO	0.238	-0.3153 to 0.7913	No	ns	0.6462
ARKO vs. DKO	0.2831	-0.2514 to 0.8177	No	ns	0.4808
LRKO vs. DKO	0.04516	-0.5081 to 0.5985	No	ns	0.996
