# Supplementary material for: Homeostatic interferon-lambda response to bacterial microbiota stimulates preemptive antiviral defense within discrete pockets of intestinal epithelium
Source: eLife. 2022 Feb 9;11:e74072. doi: 10.7554/eLife.74072 (PMC8853662; doi:10.7554/eLife.74072)
Supplement: Figure 4—source data 1. [file elife-74072-fig4-data1.xlsx]

## Sheet: Figure 4A
Figure 4A - Source Data
Description: Gene expression of ISGs from cells isolated from the epithelium and lamina propria normalized to the epithelial fraction of WT (no ABX) mice.
Ifit1										Stat1										Oas1a
Genotype	WT	WT	Ifnlr1 -/-	Ifnlr1 -/-	WT	WT	Ifnlr1 -/-	Ifnlr1 -/-		Genotype	WT	WT	Ifnlr1 -/-	Ifnlr1 -/-	WT	WT	Ifnlr1 -/-	Ifnlr1 -/-		Genotype	WT	WT	Ifnlr1 -/-	Ifnlr1 -/-	WT	WT	Ifnlr1 -/-	Ifnlr1 -/-
ABX	-	+	-	+	-	+	-	+		ABX	-	+	-	+	-	+	-	+		ABX	-	+	-	+	-	+	-	+
Fraction	Epithelium	Epithelium	Epithelium	Epithelium	LP	LP	LP	LP		Fraction	Epithelium	Epithelium	Epithelium	Epithelium	LP	LP	LP	LP		Fraction	Epithelium	Epithelium	Epithelium	Epithelium	LP	LP	LP	LP
	1.30139	0.46646	0.233528	0.218181	0.021654	0.050798	0.152463	0.110743			1.24693	0.667963	0.942621	1.01747	0.060417	0.073018	0.536383	0.258255			1.30139	0.46646	0.233528	0.218181	0.021654	0.050798	0.152463	0.110743
	0.698608	0.208769	0.226598	0.179496	0.01405	0.302425	0.097436	0.026784			0.753072	0.53774	0.697896	0.942959	0.062113	0.282663	0.252147	0.082408			0.698608	0.208769	0.226598	0.179496	0.025107	0.302425	0.097436	0.026784
	0.343794	0.381552	0.118851	0.189495	0.223034	0.049074	0.008898	0.015943			0.527442	0.358194	0.44113	0.819206	0.680776	0.149327	0.06085	0.121638			0.505634	0.381552	0.118851	0.189495	0.265853	0.049074	0.016314	0.015943
	1.65621	0.68069	0.041103	0.317823	0.066633	0.765046	0.133093	0.122879			1.47256	0.378581	0.318358	0.391365	0.127146	1.7058	0.229608	0.343629			1.49437	0.947321	0.071101	0.167255	0.112573	0.577897	0.104499	0.277475
	2.21876	0.575356	0.06215	0.105711	0.037061	0.035445	0.319414	0.007354			2.09859	0.305146	0.383347	0.45027	0.073827	0.157694	0.168432	0.064364			2.12819	0.279437	0.062519	0.222381	0.085393	0.16033	0.136266	0.061774
	1.61283	0.57031	0.121173	0.289953	0.060214	0.009263	0.090353	0.033737			0.681742	0.279214	0.503365	0.373861	0.157236	0.063847	0.212529	0.104097			0.986024	0.351683	0.145988	0.217423	0.116204	0.07439	0.137992	0.068283
	0.148285	0.489247	0.042747	0.291101	0.10167	0.026556	0.157671	0.068255			0.579827	0.560104	0.181135	1.16994	0.174617	0.075551	0.24332	0.109622			0.561199	0.567429	0.035954	0.215981	0.125483	0.142575	0.160605	0.050037
	0.275605	0.548725	0.007287	0.055698		0.060981		0.071832			0.794261	0.377792	0.151821	0.689363		0.236423		0.128447			0.653409	0.491328	0.090001	0.148092		0.177874		0.125157
	1.0906	0.000716	0.062927	0.08076		0.071986		0.05055			1.20736	0.481377	0.310658	0.937511		0.170292		0.151741			0.963503	0.540794	0.12595	0.167192		0.161742		0.088877
	0.653919	0.097228	0.000716	0.042661		0.083161		0.005894			0.63822	0.54033	0.066684	1.23437							0.707674	1.32646	0.080784	0.145081
	1.08885	0.074221	0.039582	0.024605				0.025014				0.813854	0.332542	0.294959								1.64584	0.113206	0.207486
	1.17765	1.30762	1.03684	0.02256
	0.733505	0.489029	0.250211	0.056554
			0.424263	0.119399
				0.03428
Statistical Test										Statistical Test										Statistical Test
Dunnett's multiple comparisons test	Mean Diff.	95.00% CI of diff.	Below threshold?	Summary	Adjusted P Value					Dunnett's multiple comparisons test	Mean Diff.	95.00% CI of diff.	Below threshold?	Summary	Adjusted P Value					Dunnett's multiple comparisons test	Mean Diff.	95.00% CI of diff.	Below threshold?	Summary	Adjusted P Value
WT no ABX vs. WT + ABX	0.5469	0.2293 to 0.8646	Yes	****	<0.0001					WT no ABX vs. WT + ABX	0.5182	0.1388 to 0.8975	Yes	**	0.003					WT no ABX vs. WT + ABX	0.3448	0.02942 to 0.6602	Yes	*	0.0261
WT no ABX vs. Ifnlr1-/-no ABX	0.8094	0.4975 to 1.121	Yes	****	<0.0001					WT no ABX vs. Ifnlr1-/-no ABX	0.6064	0.2270 to 0.9858	Yes	***	0.0004					WT no ABX vs. Ifnlr1-/-no ABX	0.8814	0.5660 to 1.197	Yes	****	<0.0001
WT no ABX vs. Ifnlr1-/- + ABX	0.8648	0.5579 to 1.172	Yes	****	<0.0001					WT no ABX vs. Ifnlr1-/-+ ABX	0.2435	-0.1359 to 0.6229	No	ns	0.3714					WT no ABX vs. Ifnlr1-/- + ABX	0.8111	0.4957 to 1.126	Yes	****	<0.0001
WT no ABX vs. WT no ABX	0.9251	0.5454 to 1.305	Yes	****	<0.0001					WT no ABX vs. WT no ABX	0.8091	0.3812 to 1.237	Yes	****	<0.0001					WT no ABX vs. WT no ABX	0.8925	0.5368 to 1.248	Yes	****	<0.0001
WT no ABX vs. WT + ABX	0.8545	0.5139 to 1.195	Yes	****	<0.0001					WT no ABX vs. WT + ABX	0.6762	0.2772 to 1.075	Yes	***	0.0002					WT no ABX vs. WT + ABX	0.8114	0.4798 to 1.143	Yes	****	<0.0001
WT no ABX vs. Ifnlr1-/-no ABX	0.863	0.4833 to 1.243	Yes	****	<0.0001					WT no ABX vs. Ifnlr1-/-no ABX	0.7567	0.3288 to 1.185	Yes	****	<0.0001					WT no ABX vs. Ifnlr1-/-no ABX	0.8849	0.5292 to 1.241	Yes	****	<0.0001
WT no ABX vs. Ifnlr1-/-+ ABX	0.951	0.6192 to 1.283	Yes	****	<0.0001					WT no ABX vs. Ifnlr1-/- + ABX	0.8484	0.4495 to 1.247	Yes	****	<0.0001					WT no ABX vs. Ifnlr1-/-+ ABX	0.9083	0.5767 to 1.240	Yes	****	<0.0001

## Sheet: Figure 4B
Figure 4B - Source Data
Description: Gene expression of ISGs from ileum tissue of indicated mice
Ifit1							Oas1a
Genotype	Ifnlr1 flox/flox	Ifnlr1 flox/flox	Ifnlr1 ΔIEC	Ifnlr1 ΔIEC			Genotype	WT	WT	Ifnlr1 -/-	Ifnlr1 -/-
ABX	-	+	-	+			ABX	-	+	-	+
	0.946385	0.639687	0.369441	0.906919				0.755008	0.985391	0.275785	0.378533
	1.05362	0.455094	0.711947	1.44428				1.24499	1.26169	0.271433	0.11491
	0.708108	0.0768723	0.0466532	0.102513				0.663234	0.452041	0.290761	0.156556
	0.492785	0.0348867	0.424384	0.0986621				0.460774	0.212428	0.479814	0.274575
	1.00083	0.0181078	0.627096	0.017298				0.948369	0.106017	0.360714	0.122899
	1.13684	1.1673	0.502305	0.0181554				1.25581	0.185776		0.0769903
	1.66144		0.245908	0.396155				1.67181			0.393394
	1.21353		0.530896	0.0156387							0.0760307
	0.786466			0.0957392
				0.0779577
Statistical Test							Statistical Test
Dunnett's multiple comparisons test	Mean Diff.	95.00% CI of diff.	Below threshold?	Summary	Adjusted P Value		Dunnett's multiple comparisons test	Mean Diff.	95.00% CI of diff.	Below threshold?	Summary	Adjusted P Value
Ifnlr1flox/flox no ABX vs. Ifnlr1flox/flox+ ABX	0.6013	0.09445 to 1.108	Yes	*	0.0171		Ifnlr1flox/flox no ABX vs. Ifnlr1flox/flox+ ABX	0.4661	0.006978 to 0.9252	Yes	*	0.0461
Ifnlr1flox/flox no ABX vs. Ifnlr1ΔIEC no ABX	0.5677	0.1003 to 1.035	Yes	*	0.0144		Ifnlr1flox/flox no ABX vs. Ifnlr1ΔIEC no ABX	0.6643	0.1811 to 1.148	Yes	**	0.006
Ifnlr1flox/flox no ABX vs. Ifnlr1ΔIEC+ ABX	0.6827	0.2408 to 1.125	Yes	**	0.0018		Ifnlr1flox/flox no ABX vs. Ifnlr1ΔIEC+ ABX	0.8008	0.3737 to 1.228	Yes	***	0.0003

## Sheet: Figure 4C
Figure 4C - Source Data
Description: Gene expression of ISGs from colon tissue of indicated mice
Ifit1							Oas1a
Genotype	Ifnlr1 flox/flox	Ifnlr1 flox/flox	Ifnlr1 ΔIEC	Ifnlr1 ΔIEC			Genotype	WT	WT	Ifnlr1 -/-	Ifnlr1 -/-
ABX	-	+	-	+			ABX	-	+	-	+
	0.612092	0.513639	0.342928	0.359545				0.70844	0.623582	0.59951	0.279764
	1.38791	0.932813	0.332311	0.11528				1.29156	0.847775	0.20321	0.156524
	0.408763	0.973273	0.279003	0.111164				0.881174	0.521878	0.284328	0.259832
	0.498234	0.337044	0.856809	0.0797861				0.664278	0.402486	0.415886	0.225984
	1.7321	0.0547582	0.319805	0.0492436				1.03891	0.128583	0.353282	0.118282
	0.716661	0.222267		0.0749814				0.758697	0.31409		0.163181
	1.64424			0.149731				1.65695			0.150352
				0.0683167							0.139421
Statistical Test							Statistical Test
Dunnett's multiple comparisons test	Mean Diff.	95.00% CI of diff.	Below threshold?	Summary	Adjusted P Value		Dunnett's multiple comparisons test	Mean Diff.	95.00% CI of diff.	Below threshold?	Summary	Adjusted P Value
Ifnlr1flox/flox no ABX vs. Ifnlr1flox/flox+ ABX	0.4944	-0.02085 to 1.010	No	ns	0.0619		Ifnlr1flox/flox no ABX vs. Ifnlr1flox/flox+ ABX	0.5269	0.1959 to 0.8580	Yes	**	0.0016
Ifnlr1flox/flox no ABX vs. Ifnlr1ΔIEC no ABX	0.5738	0.03158 to 1.116	Yes	*	0.0365		Ifnlr1flox/flox no ABX vs. Ifnlr1ΔIEC no ABX	0.6288	0.2804 to 0.9772	Yes	***	0.0005
Ifnlr1flox/flox no ABX vs. Ifnlr1ΔIEC+ ABX	0.874	0.3947 to 1.353	Yes	***	0.0004		Ifnlr1flox/flox no ABX vs. Ifnlr1ΔIEC+ ABX	0.8133	0.5054 to 1.121	Yes	****	<0.0001
