# Supplementary material for: Homeostatic interferon-lambda response to bacterial microbiota stimulates preemptive antiviral defense within discrete pockets of intestinal epithelium
Source: eLife. 2022 Feb 9;11:e74072. doi: 10.7554/eLife.74072 (PMC8853662; doi:10.7554/eLife.74072)
Supplement: Figure 5—figure supplement 1—source data 1. [file elife-74072-fig5-figsupp1-data1.xlsx]

## Sheet: Figure 5 - Figure Supplement 1A
Figure 5 - Figure Supplement 1A - Source Data
Description: Enrichment of all EpCAM+ cells from EpCAM-enriched stripped intestinal epithelium
	Pre-Enrichment			Post-Enrichment
	H2O	ABX	pI:C	H2O	ABX	pI:C
	50.2	62.5	52.2	87.2	91.4	86.1
	51.8	67.8	51.3	89.5	92.9	92.3
	72.1	64.9	55.3	93.9	95.1	92.2
	71	71.9	60.8	92.1	95.7	95.3
	75	81.2	60.7	94.4		93.3
	73.5		64.5	95.6

## Sheet: Figure 5 - Figure Supplement 1B
Figure 5 - Figure Supplement 1B - Source Data
Description: Enrichment of all CD45+ cells from CD45-enriched stripped intestinal epithelium
	Pre-Enrichment			Post-Enrichment
	H2O	ABX	pI:C	H2O	ABX	pI:C
	3.97	3.29	8.07	45.6	37.7	73.1
	9.48	4.33	14.4	83.6	62.2	87.7
	4.07	4.5	6.8	57.2	61.4	26.2
	5.44	2.26	4.32	41.8	42.3	55.9
	4.62	1.66	5.29	48.8	39.5	64.1
	4.42		6.45	57.4		50.3

## Sheet: Figure 5 - Figure Supplement 1C
Figure 5 - Figure Supplement 1C - Source Data
Description: Enrichment of all CD45+ cells from CD45-enriched lamina propria digest from the ileum
	Pre-Enrichment			Post-Enrichment
	H2O	ABX	pI:C	H2O	ABX	pI:C
	23.9	7.6	14	61.7	58.4	59.2
	19.2	17.5	17.7	57.8	61.8	51
	16.6	11.3	25.2	56.4	52.3	59.4
	12.2	20.2	20.4	38.4	56.1	46.8
	13	21.4	26.8	43.8	58.8	47.3
	13	14.2	10.8	46.9	52.3	65.1
