# Supplementary material for: Homeostatic interferon-lambda response to bacterial microbiota stimulates preemptive antiviral defense within discrete pockets of intestinal epithelium
Source: eLife. 2022 Feb 9;11:e74072. doi: 10.7554/eLife.74072 (PMC8853662; doi:10.7554/eLife.74072)
Supplement: Figure 5—source data 1. [file elife-74072-fig5-data1.xlsx]

## Sheet: Figure 5A
Figure 5A - Source Data
Description:	Log10 Ifnl2/3 transcripts relative to Rps29 from each cell fraction and treatment
	H2O	H2O	H2O	H2O	H2O	H2O	ABX	ABX	ABX	ABX	ABX	ABX	pIC	pIC	pIC	pIC	pIC	pIC
Strip (EpCAM+)	-5.1	-4.68963	-5.1	-5.1	-5.1	-5.1	-5.1	-4.82566	-5.1	-4.96114			-3.70027	-3.15755	-3.53308	-4.5624	-3.52295
Strip (CD45+)	-4.09327	-3.28899	-3.48536	-3.70379	-4.081	-3.7829	-3.91391	-4.173	-4.74091	-3.88216	-5.1		-2.4407	-2.58827	-2.18234	-3.11218	-2.3112	-2.39021
LP (CD45+)	-3.84781	-3.91463	-3.63434	-3.50732	-4.08752	-4.28823	-3.77793	-4.82218	-4.21316	-3.47767	-5.1	-4.97313	-2.30818	-2.45953	-2.68802	-2.52455	-2.57754	-2.75565
Statistical Test
Dunnett's multiple comparisons test	Predicted (LS) mean diff.	95.00% CI of diff.	Below threshold?	Summary	Adjusted P Value
Strip (EpCAM+)
H2O vs. ABX	-0.03491	-0.6167 to 0.5469	No	ns	0.9867
H2O vs. poly I:C	-1.336	-1.882 to -0.7906	Yes	****	<0.0001
Strip (CD45+)
H2O vs. ABX	0.6228	0.07831 to 1.167	Yes	*	0.023
H2O vs. poly I:C	-1.235	-1.754 to -0.7159	Yes	****	<0.0001
LP (CD45+)
H2O vs. ABX	0.514	-0.004447 to 1.033	No	ns	0.0523
H2O vs. poly I:C	-1.328	-1.846 to -0.8092	Yes	****	<0.0001

## Sheet: Figure 5B
Figure 5B - Source Data
Description:	Log10 Ifnb1 transcripts relative to Rps29 from each cell fraction and treatment
	H2O	H2O	H2O	H2O	H2O	H2O		ABX	ABX	ABX	ABX	ABX	ABX		pIC	pIC	pIC	pIC	pIC	pIC
Strip (EpCAM+)	-5.1	-5.1	-5.1	-5.1	-5.1	-5.1		-3.30886	-4.82566	-5.1	-4.96114				-4.69236	-5.1	-4.9174	-5.1	-4.45351
Strip (CD45+)	-2.88622	-4.51371	-4.51646	-3.55757	-5.1	-5.1		-3.90706	-4.58229	-4.74091	-4.85636	-5.1			-3.15667	-3.10008	-3.00851	-3.37164	-2.81403	-2.85354
LP (CD45+)	-3.57148	-3.60153	-3.51812	-3.74522	-3.77318	-4.13339		-3.09135	-3.7454	-3.79549	-3.63442	-3.84472	-3.87276		-0.710283	-0.961749	-1.16425	-0.845563	-1.09421	-1.20686
Statistical Test
Dunnett's multiple comparisons test	Predicted (LS) mean diff.	95.00% CI of diff.	Below threshold?	Summary	Adjusted P Value
Strip (EpCAM+)
H2O vs. ABX	-0.5511	-1.215 to 0.1130	No	ns	0.1156
H2O vs. poly I:C	-0.2473	-0.8703 to 0.3756	No	ns	0.5741
Strip (CD45+)
H2O vs. ABX	0.3583	-0.2632 to 0.9798	No	ns	0.3244
H2O vs. poly I:C	-1.228	-1.821 to -0.6357	Yes	****	<0.0001
LP (CD45+)
H2O vs. ABX	-0.0598	-0.6516 to 0.5320	No	ns	0.9616
H2O vs. poly I:C	-2.727	-3.318 to -2.135	Yes	****	<0.0001
