# Supplementary material for: Homeostatic interferon-lambda response to bacterial microbiota stimulates preemptive antiviral defense within discrete pockets of intestinal epithelium
Source: eLife. 2022 Feb 9;11:e74072. doi: 10.7554/eLife.74072 (PMC8853662; doi:10.7554/eLife.74072)
Supplement: Figure 6—figure supplement 1—source data 1. [file elife-74072-fig6-figsupp1-data1.xlsx]

## Sheet: Figure 6 - Figure Supplement 1A
Figure 6 - Figure Supplement 1A - Source Data
Description: Fold change of Ifit1 gene expression normalized to Rps29 from the ileum tissue of mice mock injected compared to mice injected with 3ug of IFN-lambda
	PBS	IFN-lambda
	1.30841	49.3958
	0.876444	51.2864
	1.01228	27.2328
	0.802864	25.8351
	Unpaired t test
	P value	0.0016
	P value summary	**
	Significantly different (P < 0.05)?	Yes
	One- or two-tailed P value?	Two-tailed
	t, df	t=5.433, df=6

## Sheet: Figure 6 - Figure Supplement 1B
Figure 6 - Figure Supplement 1B - Source Data
Description: Fold change of Isg15 gene expression normalized to Rps29 from the ileum tissue of mice mock injected compared to mice injected with 3ug of IFN-lambda
	PBS	IFN-lambda
	1.30543	129.961
	0.81975	148.001
	0.687251	72.2669
	1.18757	51.6893
	Unpaired t test
	P value	0.0049
	P value summary	**
	Significantly different (P < 0.05)?	Yes
	One- or two-tailed P value?	Two-tailed
	t, df	t=4.340, df=6

## Sheet: Figure 6 - Figure Supplement 1C
Figure 6 - Figure Supplement 1C - Source Data
Description: Fold change of Mx2 gene expression normalized to Rps29 from the ileum tissue of mice mock injected compared to mice injected with 3ug of IFN-lambda
	PBS	IFN-lambda
	1.20917	77.4809
	0.807617	85.1126
	1.09709	64.6042
	0.886122	51.4289
	Unpaired t test
	P value	<0.0001
	P value summary	****
	Significantly different (P < 0.05)?	Yes
	One- or two-tailed P value?	Two-tailed
	t, df	t=9.272, df=6

## Sheet: Figure 6 - Figure Supplement 1D
Figure 6 - Figure Supplement 1D - Source Data
Description: Area of Ifit1 fluorescence as a percentage of the total area of the tissue section
	PBS	IFN-lambda
	0.56	41.96
	2.33	55.45
	3.33	42.28
	1.6	27.6
	Unpaired t test
	P value	0.0004
	P value summary	***
	Significantly different (P < 0.05)?	Yes
	One- or two-tailed P value?	Two-tailed
	t, df	t=6.973, df=6
