# Supplementary material for: Homeostatic interferon-lambda response to bacterial microbiota stimulates preemptive antiviral defense within discrete pockets of intestinal epithelium
Source: eLife. 2022 Feb 9;11:e74072. doi: 10.7554/eLife.74072 (PMC8853662; doi:10.7554/eLife.74072)
Supplement: Figure 6—figure supplement 2—source data 1. [file elife-74072-fig6-figsupp2-data1.xlsx]

## Sheet: Figure 6 - Figure Supplement 2E
Figure 6 - Figure Supplement 2E - Source Data
Description: Area of Ifit1 fluorescence as a percentage of the total area of the tissue section and normalized to het/het mice
Ileum
Ifnar1	het	KO	het	KO
Ifnlr1	het	het	KO	KO
	3.32303	3.6365	0.481685	0.358412
	0.803932	0.669239	0.451749	0.377479
	1.06919	1.88861	1.43549	0.094296
	3.17908	0.701485	0.248067	0.121088
	2.79443	2.07293
		1.52805
		0.42744
Dunnett's multiple comparisons test	Mean Diff.	95.00% CI of diff.	Below threshold?	Summary	Adjusted P Value
Dhet vs. IFNAR KO	0.6733	-0.7586 to 2.105	No	ns	0.4945
Dhet vs. IFNLR1 KO	1.58	-0.06079 to 3.220	No	ns	0.0602
Dhet vs. DKO	1.996	0.3556 to 3.637	Yes	*	0.0162
