# Supplementary material for: Homeostatic interferon-lambda response to bacterial microbiota stimulates preemptive antiviral defense within discrete pockets of intestinal epithelium
Source: eLife. 2022 Feb 9;11:e74072. doi: 10.7554/eLife.74072 (PMC8853662; doi:10.7554/eLife.74072)
Supplement: Figure 6—source data 1. [file elife-74072-fig6-data1.xlsx]

## Sheet: Figure 6D
Figure 6D - Source Data
Description:	Area of Ifit1 fluorescence as a percentage of the total area of the tissue section
Ifnlr1flox/flox	Ifnlr1ΔIEC
1.04	0.22
2.69	0.16
1.27	0.31
2	0.21
3.73	0.18
0.35	0.36
	0.06
Statistical Test
Unpaired t test
P value	0.0046
P value summary	**
Significantly different (P < 0.05)?	Yes
One- or two-tailed P value?	Two-tailed
t, df	t=3.538, df=11
Mean of column A	1.847
Mean of column B	0.2143
Difference between means (B - A) ± SEM	-1.632 ± 0.4613
95% confidence interval	-2.648 to -0.6170
R squared (eta squared)	0.5323

## Sheet: Figure 6G
Figure 6G - Source Data
Description:	Area of Ifit1 fluorescence as a percentage of the total area of the tissue section
H2O	ABX
0.95	0.22
0.89	0.91
2.05	0.09
0.6	0.34
3.28	0.66
1.41	0.25
2.47	0.32
	0.11
Statistical Test
Unpaired t test
P value	0.0031
P value summary	**
Significantly different (P < 0.05)?	Yes
One- or two-tailed P value?	Two-tailed
t, df	t=3.620, df=13
Mean of column A	1.664
Mean of column B	0.3625
Difference between means (B - A) ± SEM	-1.302 ± 0.3596
95% confidence interval	-2.079 to -0.5248
R squared (eta squared)	0.502
