# Supplementary material for: Homeostatic interferon-lambda response to bacterial microbiota stimulates preemptive antiviral defense within discrete pockets of intestinal epithelium
Source: eLife. 2022 Feb 9;11:e74072. doi: 10.7554/eLife.74072 (PMC8853662; doi:10.7554/eLife.74072)
Supplement: Figure 7—source data 1. [file elife-74072-fig7-data1.xlsx]

## Sheet: Figure 7A
Figure 7A - Source Data
Description: i) Percentage of each cell type expressing individual ISGs ii) Number of each cell type expressing individual ISGs iii) Total number of each cell type
i)
	Endocrine	Enterocyte.Immature.Distal	Enterocyte.Immature.Proximal	Enterocyte.Mature.Distal	Enterocyte.Mature.Proximal	Enterocyte Progenitor	Enterocyte Progenitor Early	Enterocyte Progenitor Late	Goblet	Paneth	Stem	TA Early	TA G1	TA G2	Tuft
Ifit1	0.645161	1.17188	0.3367	4.56431	4.64716	0.440529	0.482509	0.247525	0.784314	0	0.23678	0.451128	0.245098	0	2.40964
Isg15	1.29032	6.25	6.73401	21.1618	19.9656	3.4613	2.89505	3.21782	8.43137	1.15385	1.57853	2.40602	1.71569	3.65854	11.4458
Rsad2	1.29032	0.195312	0	1.24481	1.20482	0.0629327	0.120627	0	0	0	0	0.150376	0	0	2.40964
Oas3	0	0.195312	0	3.73444	3.78658	0.314663	0.361882	0.247525	1.37255	0.384615	0.0789266	0	0	0.243902	2.40964
Dhx58	0.645161	1.5625	2.6936	1.65975	1.20482	1.00692	1.20627	0.495049	1.56863	0.384615	0.47356	0.300752	0.245098	0.243902	3.01205
Oasl2	2.90323	3.125	2.6936	9.95851	8.0895	2.64317	3.25694	1.48515	7.05882	3.07692	3.15706	1.95489	2.69608	3.17073	13.8554
Gm5431	0	0	0.3367	1.65975	1.20482	0	0	0	0.196078	0.384615	0.394633	0	0	0.243902	0
Rnf213	5.16129	12.1094	10.4377	14.1079	14.8021	9.37697	10.2533	9.90099	8.23529	5	6.94554	5.71429	10.049	7.31707	13.8554
Zbp1	6.77419	6.64062	2.0202	7.88382	10.327	1.44745	1.44753	1.23762	18.8235	0.769231	1.26283	0.75188	0.490196	1.46341	9.03614
Rtp4	8.06452	1.17188	2.0202	9.54357	7.57315	1.76212	2.17129	0.990099	4.70588	2.69231	2.84136	2.25564	1.96078	4.87805	12.0482
Igtp	2.25807	4.88281	2.3569	4.97925	7.0568	2.32851	2.77443	1.23762	2.94118	1.53846	3.07814	1.95489	3.18628	3.17073	7.22892
Ifi47	8.3871	13.2812	7.40741	9.54357	5.67986	8.18125	9.65018	6.43564	9.60784	8.84615	11.1287	9.62406	11.5196	11.4634	9.63855
Stat1	7.41936	16.9922	17.8451	16.1826	16.8675	14.8521	17.2497	9.40594	10.7843	15.7692	10.2605	8.42105	12.5	9.7561	13.253
Irgm2	0	2.14844	0	2.07469	1.37694	1.13279	1.3269	0.495049	1.76471	1.15385	0.947119	0.300752	0.245098	1.21951	0
Helz2	2.58065	5.46875	7.07071	11.2033	7.91738	4.65702	4.70446	4.45545	4.90196	3.07692	2.28887	1.95489	3.43137	3.65854	2.40964
Nlrc5	0	0.976562	0.3367	2.07469	0	0.440529	0.482509	0.495049	0.196078	0.384615	0.394633	0.451128	0	0.487805	0
Ddx60	0.967742	0.78125	0.673401	2.07469	2.58176	0.314663	0.241255	0.742574	3.13726	1.53846	0.631413	0.451128	0.490196	0	1.20482
Il18bp	1.29032	1.17188	0.673401	3.3195	1.72117	0.629327	0.361882	1.48515	3.33333	1.92308	0.631413	0.601504	0.490196	0.487805	6.0241
Upp1	37.7419	41.9922	47.8115	68.8797	62.6506	17.6841	15.6815	23.0198	9.80392	6.92308	7.34017	8.87218	12.5	6.58537	15.0602
ii)
	Endocrine	Enterocyte.Immature.Distal	Enterocyte.Immature.Proximal	Enterocyte.Mature.Distal	Enterocyte.Mature.Proximal	Enterocyte Progenitor	Enterocyte Progenitor Early	Enterocyte Progenitor Late	Goblet	Paneth	Stem	TA Early	TA G1	TA G2	Tuft
Ifit1	2	6	1	11	27	7	4	1	4	0	3	3	1	0	4
Isg15	4	32	20	51	116	55	24	13	43	3	20	16	7	15	19
Rsad2	4	1	0	3	7	1	1	0	0	0	0	1	0	0	4
Oas3	0	1	0	9	22	5	3	1	7	1	1	0	0	1	4
Dhx58	2	8	8	4	7	16	10	2	8	1	6	2	1	1	5
Oasl2	3	4	2	5	15	5	2	3	16	4	8	3	2	0	2
Gm5431	9	16	8	24	47	42	27	6	36	8	40	13	11	13	23
Rnf213	0	0	1	4	7	0	0	0	1	1	5	0	0	1	0
Zbp1	16	62	31	34	86	149	85	40	42	13	88	38	41	30	23
Rtp4	21	34	6	19	60	23	12	5	96	2	16	5	2	6	15
Igtp	25	6	6	23	44	28	18	4	24	7	36	15	8	20	20
Ifi47	175	238	144	93	219	830	487	175	173	93	495	293	198	218	65
Stat1	18	28	14	30	82	45	22	12	20	7	28	16	5	14	12
Irgm2	23	87	53	39	98	236	143	38	55	41	130	56	51	40	22
Helz2	0	11	0	5	8	18	11	2	9	3	12	2	1	5	0
Nlrc5	8	28	21	27	46	74	39	18	25	8	29	13	14	15	4
Ddx60	0	5	1	5	0	7	4	2	1	1	5	3	0	2	0
Il18bp	4	6	2	8	10	10	3	6	17	5	8	4	2	2	10
Upp1	117	215	142	166	364	281	130	93	50	18	93	59	51	27	25
iii)	Endocrine	Enterocyte.Immature.Distal	Enterocyte.Immature.Proximal	Enterocyte.Mature.Distal	Enterocyte.Mature.Proximal	Enterocyte Progenitor	Enterocyte Progenitor Early	Enterocyte Progenitor Late	Goblet	Paneth	Stem	TA Early	TA G1	TA G2	Tuft
	310	512	297	241	581	1589	829	404	510	260	1267	665	408	410	166

## Sheet: Figure 7B
Figure 7B - Source Data
Description: i) Percentage of each cell type expressing individual ISGs ii) Number of each cell type expressing individual ISGs iii) Total number of each cell type where "enterocyte" = "mature distal enterocyte" + "mature proximal enterocyte"; and "Stem + TA" = "stem" + "TA early" + "TA G1" + "TA G2"
i)
	Enterocyte	Stem+TA		Statistical Test
Ddx60	2.43309	0.472727
Dhx58	1.3382	0.363636		Wilcoxon matched-pairs signed rank test
Gm5431	1.3382	0.218182		P value	0.0002
Helz2	8.88078	2.58182		Exact or approximate P value?	Exact
Ifi47	6.81265	10.8727		P value summary	***
Ifit1	4.62287	0.254545		Significantly different (P < 0.05)?	Yes
Igtp	6.44769	2.83636		One- or two-tailed P value?	Two-tailed
Il18bp	2.18978	0.581818		Sum of positive, negative ranks	180.0 , -10.00
Irgm2	1.58151	0.727273		Sum of signed ranks (W)	170
Isg15	20.3163	2.10909		Number of pairs	19
Nlrc5	0.608273	0.363636		Number of ties (ignored)	0
Oas3	3.77129	0.0727273
Oasl2	8.63747	2.8
Rnf213	14.5985	7.16364
Rsad2	1.21655	0.0363636
Rtp4	8.15085	2.87273
Stat1	16.6667	10.0727
Upp1	64.4769	8.36364
Zbp1	9.61071	1.05455
ii)
	Enterocyte	Stem+TA
Ddx60	20	13
Dhx58	11	10
Gm5431	11	6
Helz2	73	71
Ifi47	56	299
Ifit1	38	7
Igtp	53	78
Il18bp	18	16
Irgm2	13	20
Isg15	167	58
Nlrc5	5	10
Oas3	31	2
Oasl2	71	77
Rnf213	120	197
Rsad2	10	1
Rtp4	67	79
Stat1	137	277
Upp1	530	230
Zbp1	79	29
iii)	Enterocyte	Stem+TA
	822	2750

## Sheet: Figure 7C
Figure 7C - Source Data
Description: i) Percentage of each cell type expressing individual ISGs ii) Number of each cell type expressing individual ISGs iii) Total number of each cell type
i)
	crypt	early enterocyte	goblet cell	TA	enterocyte
DDX60	9.72222	9.67742	25	21.4286	22.0447
DHX58	2.77778	4.83871	4.16667	0	3.19489
HELZ2	18.0556	12.9032	18.75	14.2857	24.9201
IFIT1	5.55556	9.67742	14.5833	3.57143	23.9617
IL18BP	0	3.22581	4.16667	0	1.59744
ISG15	11.1111	40.3226	45.8333	14.2857	77.9553
NLRC5	6.94444	1.6129	18.75	14.2857	6.38978
OAS3	8.33333	8.06452	12.5	32.1429	15.9744
RNF213	36.1111	45.1613	31.25	50	60.0639
RSAD2	2.77778	0	6.25	0	13.4185
RTP4	12.5	4.83871	10.4167	14.2857	7.66773
STAT1	20.8333	24.1935	18.75	42.8571	30.6709
UPP1	18.0556	11.2903	6.25	17.8571	14.377
ZBP1	4.16667	3.22581	6.25	0	5.43131
ii)
	crypt	early enterocyte	goblet cell	TA	enterocyte
DDX60	7	6	12	6	69
DHX58	2	3	2	0	10
HELZ2	13	8	9	4	78
IFIT1	4	6	7	1	75
IL18BP	0	2	2	0	5
ISG15	8	25	22	4	244
NLRC5	5	1	9	4	20
OAS3	6	5	6	9	50
RNF213	26	28	15	14	188
RSAD2	2	0	3	0	42
RTP4	9	3	5	4	24
STAT1	15	15	9	12	96
UPP1	13	7	3	5	45
ZBP1	3	2	3	0	17
iii)	crypt	early enterocyte	goblet cell	TA	enterocyte
	72	62	48	28	313

## Sheet: Figure 7D
Figure 7D - Source Data
Description: i) Percentage of each cell type expressing individual ISGs ii) Number of each cell type expressing individual ISGs iii) Total number of each cell type
i)
	crypt	enterocyte		Statistical Test
DDX60	9.72222	22.0447
DHX58	2.77778	3.19489		Wilcoxon matched-pairs signed rank test
HELZ2	18.0556	24.9201		P value	0.0107
IFIT1	5.55556	23.9617		Exact or approximate P value?	Exact
IL18BP	0	1.59744		P value summary	*
ISG15	11.1111	77.9553		Significantly different (P < 0.05)?	Yes
NLRC5	6.94444	6.38978		One- or two-tailed P value?	Two-tailed
OAS3	8.33333	15.9744		Sum of positive, negative ranks	92.00 , -13.00
RNF213	36.1111	60.0639		Sum of signed ranks (W)	79
RSAD2	2.77778	13.4185		Number of pairs	14
RTP4	12.5	7.66773		Number of ties (ignored)	0
STAT1	20.8333	30.6709
UPP1	18.0556	14.377
ZBP1	4.16667	5.43131
ii)
	crypt	enterocyte
DDX60	7	69
DHX58	2	10
HELZ2	13	78
IFIT1	4	75
IL18BP	0	5
ISG15	8	244
NLRC5	5	20
OAS3	6	50
RNF213	26	188
RSAD2	2	42
RTP4	9	24
STAT1	15	96
UPP1	13	45
ZBP1	3	17
iii)	crypt	enterocyte
	72	313
