# Supplementary material for: Homeostatic interferon-lambda response to bacterial microbiota stimulates preemptive antiviral defense within discrete pockets of intestinal epithelium
Source: eLife. 2022 Feb 9;11:e74072. doi: 10.7554/eLife.74072 (PMC8853662; doi:10.7554/eLife.74072)
Supplement: Figure 8—figure supplement 1—source data 1. [file elife-74072-fig8-figsupp1-data1.xlsx]

## Sheet: Figure 8 - Figure Supplement 1A
Figure 8 - Figure Supplement 1A - Source Data
Description: Ifit1 gene expression normalized to Rps29
Antibiotics	-	+	+	+	+	+
Fecal Transfer	-	-	+	-	-	-
LPS	-	-	-	+	-	-
Flagellin	-	-	-	-	+	-
CpG	-	-	-	-	-	+
	0.927869	0.285782	0.360448	0.173045	1.14541	0.218372
	1.07213	0.257149	0.655795	1.11954	2.41885	0.114311
	1.18277	0.229194	0.294151	1.20961	2.09172	0.570734
	0.817228	0.381836	0.305625	1.37721	3.19907	0.534812
	0.569183	0.362	0.302987	0.647845	0.0142587	0.0976368
	1.43082	0.642788	0.212235	1.28597	0.0354344	0.0608535
	0.812069	0.08618	0.476579	3.54354	0.0741277	0.539508
	1.18793	0.079905	1.6488	0.057634	0.139024	0.207725
	0.991458	0.051451	6.11035	0.233545	0.202295
	1.00854	0.0780698	10.1985	0.0671708	0.289715
	2.04954	0.090599	19.4154	0.254848	0.150688
	0.513563	0.102642	0.0904129	0.33142
	0.436895	0.245538	0.0611099	0.327136
	1.67609	0.0914132	0.250099	0.193465
	1.50271	0.132497	0.24235	1.1044
	0.649352	1.58556	0.532286	0.28457
	0.625172	0.328417	0.161966	0.165924
	0.546679	0.33586	0.267079	0.331878
	1.31352	1.7096	0.078309	0.117207
	0.686478	0.003511	0.260911	0.657241
	0.997144	0.013246	0.183153	0.22938
	1.00286	0.005855	0.337605
		0.018714	1.99291
		0.207724	5.6645
		0.482224	0.117971
		0.407294	6.70614
			49.4578
			0.230311
			0.357872
			0.614724
Dunn's multiple comparisons test	Mean rank diff.	Significant?	Summary	Adjusted P Value
WT + ABX vs. WT no ABX	-48.48	Yes	****	<0.0001
WT + ABX vs. WT + ABX + FT	-24.88	Yes	*	0.0332
WT + ABX vs. WT + ABX + LPS	-19.42	No	ns	0.2651
WT + ABX vs. WT + ABX + CpG	-3.471	No	ns	>0.9999
WT + ABX vs. WT + ABX + Flagellin	-13.85	No	ns	>0.9999

## Sheet: Figure 8 - Figure Supplement 1B
Figure 8 - Figure Supplement 1B - Source Data
Description: Stat1 gene expression normalized to Rps29
Antibiotics	-	+	+	+	+	+
Fecal Transfer	-	-	+	-	-	-
LPS	-	-	-	+	-	-
Flagellin	-	-	-	-	+	-
CpG	-	-	-	-	-	+
	1.0836	0.599158	0.489435	0.54612	1.59432	0.502278
	0.916402	0.721593	0.889293	1.7443	2.21762	0.484598
	1.16629	0.642078	0.61812	1.48717	2.73041	0.872605
	0.833706	0.879565	0.562345	1.22691	3.58696	1.1088
	0.580114	0.840336	0.741323	0.958909	0.0668163	0.183355
	1.41989	0.934271	0.697332	1.26853	0.527969	0.242335
	0.774772	0.249426	0.513548	2.58124	0.316855	0.751909
	1.22523	0.186069	1.47623	0.605832	0.652899	0.784803
	0.478709	0.135028	3.71108	1.02404	0.671109
	1.35144	0.571982	3.71497	0.207018	0.605919
	1.19027	0.866061	3.05727	0.794115	0.631315
	0.979576	0.971179	0.818469	0.633736
	1	0.561863	0.180043	0.581889
		0.589416	0.755793	0.542342
		0.587523	0.578518	1.26379
		0.0728146	0.567835	0.335809
		0.0626106	0.375833	0.0185897
		1.30546	0.613518
			0.534457
			0.631216
			0.22443
			0.779323
			0.241254
			1.05676
			0.0110936
			0.361141
			5.85496
Dunn's multiple comparisons test	Mean rank diff.	Significant?	Summary	Adjusted P Value
WT + ABX vs. WT no ABX	-25	No	ns	0.0591
WT + ABX vs. WT + ABX + FT	-5.907	No	ns	>0.9999
WT + ABX vs. WT + ABX + LPS	-13.43	No	ns	0.7267
WT + ABX vs. WT + ABX + CpG	0.5139	No	ns	>0.9999
WT + ABX vs. WT + ABX + Flagellin	-13.43	No	ns	0.9916

## Sheet: Figure 8 - Figure Supplement 1C
Figure 8 - Figure Supplement 1C - Source Data
Description: Oas1a gene expression normalized to Rps29
Antibiotics	-	+	+	+	+	+
Fecal Transfer	-	-	+	-	-	-
LPS	-	-	-	+	-	-
Flagellin	-	-	-	-	+	-
CpG	-	-	-	-	-	+
	0.796679	0.485849	1.1648	0.479294	6.18716	0.537913
	1.20332	0.54563	0.858214	1.51579	12.0564	0.557784
	1.36898	0.743203	0.614593	1.60754	12.375	0.638589
	0.631019	0.815827	0.855211	1.08097	11.7683	0.848327
	0.748816	0.603068	0.528014	1.51492	0.147662	0.533209
	1.25118	1.85509	0.96472	1.00574	0.260612	0.302799
	0.845302	0.21619	0.863624	17.5517	0.252579	0.971663
	1.02501	0.257677	18.0748	0.594966	0.529707	0.553821
	1.19834	0.206082	16.6789	0.240706
	0.931346	0.51566	11.9021	0.383669
	0.734184	0.502327	0.271553	0.361401
	1.26582	0.700038	0.580665	0.18435
	1	0.429844	0.504491	0.704775
		0.29606	0.458475	0.248981
		0.40226	0.224672	0.775569
		0.0580454	0.792036	0.888424
		0.185825	0.815035	0.262954
		0.8801	0.61649	0.0293188
			0.418821
			0.440958
			2.05564
			0.0174964
			0.929032
			2.001
Dunn's multiple comparisons test	Mean rank diff.	Significant?	Summary	Adjusted P Value
WT + ABX vs. WT no ABX	-31.93	Yes	**	0.0034
WT + ABX vs. WT + ABX + FT	-18.65	No	ns	0.1029
WT + ABX vs. WT + ABX + LPS	-11.94	No	ns	0.8273
WT + ABX vs. WT + ABX + CpG	-10.15	No	ns	>0.9999
WT + ABX vs. WT + ABX + Flagellin	-19.53	No	ns	0.3764

## Sheet: Figure 8 - Figure Supplement 1E
Figure 8 - Figure Supplement 1A - Source Data
Description: Number of Ifit1 + mice (falling above 1 standard deviation from the mean of ABX-treated mice) and number of Ifit1 - mice (falling below 1 standard deviation from the mean of ABX-treated mice)
	Ifit1 +	Ifit1 -
H2O/PBS	15	7
ABX/PBS	2	24
ABX/FT	8	22
ABX/LPS	6	15
ABX/Flg	4	7
ABX/CpG	0	8
Statistical Tests
ABX/PBS v. H2O/PBS
P value and statistical significance
Test	Fisher's exact test
P value	<0.0001
P value summary	****
One- or two-sided	One-sided
Statistically significant (P < 0.05)?	Yes
ABX/PBS v. ABX/FT
P value and statistical significance
Test	Fisher's exact test
P value	0.0647
P value summary	ns
One- or two-sided	One-sided
Statistically significant (P < 0.05)?	No
ABX/PBS v. ABX/LPS
P value and statistical significance
Test	Fisher's exact test
P value	0.0663
P value summary	ns
One- or two-sided	One-sided
Statistically significant (P < 0.05)?	No
ABX/PBS v. ABX/Flg
P value and statistical significance
Test	Fisher's exact test
P value	0.0515
P value summary	ns
One- or two-sided	One-sided
Statistically significant (P < 0.05)?	No
ABX/PBS v. ABX/CpG
P value and statistical significance
Test	Fisher's exact test
P value	0.5793
P value summary	ns
One- or two-sided	One-sided
Statistically significant (P < 0.05)?	No

## Sheet: Figure 8 - Figure Supplement 1F
Figure 8 - Figure Supplement 1A - Source Data
Description: Number of Stat1 + mice (falling above 1 standard deviation from the mean of ABX-treated mice) and number of Stat1 - mice (falling below 1 standard deviation from the mean of ABX-treated mice)
	Stat1 +	Stat1 -
H2O/PBS	5	8
ABX/PBS	2	16
ABX/FT	6	21
ABX/LPS	8	9
ABX/Flg	4	7
ABX/CpG	1	7
Statistical Tests
ABX/PBS v. H2O/PBS
P value and statistical significance
Test	Fisher's exact test
P value	0.0047
P value summary	**
One- or two-sided	One-sided
Statistically significant (P < 0.05)?	Yes
ABX/PBS v. ABX/FT
P value and statistical significance
Test	Fisher's exact test
P value	0.2946
P value summary	ns
One- or two-sided	One-sided
Statistically significant (P < 0.05)?	No
ABX/PBS v. ABX/LPS
P value and statistical significance
Test	Fisher's exact test
P value	0.0228
P value summary	*
One- or two-sided	One-sided
Statistically significant (P < 0.05)?	Yes
ABX/PBS v. ABX/Flg
P value and statistical significance
Test	Fisher's exact test
P value	0.0053
P value summary	**
One- or two-sided	One-sided
Statistically significant (P < 0.05)?	Yes
ABX/PBS v. ABX/CpG
P value and statistical significance
Test	Fisher's exact test
P value	0.6862
P value summary	ns
One- or two-sided	One-sided
Statistically significant (P < 0.05)?	No

## Sheet: Figure 8 - Figure Supplement 1G
Figure 8 - Figure Supplement 1G - Source Data
Description: Number of Oas1a + mice (falling above 1 standard deviation from the mean of ABX-treated mice) and number of Oas1a - mice (falling below 1 standard deviation from the mean of ABX-treated mice)
	Oas1a +	Oas1a -
H2O/PBS	7	6
ABX/PBS	1	17
ABX/FT	7	17
ABX/LPS	6	12
ABX/Flg	4	4
ABX/CpG	1	8
Statistical Tests
ABX/PBS v. H2O/PBS
P value and statistical significance
Test	Fisher's exact test
P value	0.0041
P value summary	**
One- or two-sided	One-sided
Statistically significant (P < 0.05)?	Yes
ABX/PBS v. ABX/FT
P value and statistical significance
Test	Fisher's exact test
P value	0.059
P value summary	ns
One- or two-sided	One-sided
Statistically significant (P < 0.05)?	No
ABX/PBS v. ABX/LPS
P value and statistical significance
Test	Fisher's exact test
P value	0.0438
P value summary	*
One- or two-sided	One-sided
Statistically significant (P < 0.05)?	Yes
ABX/PBS v. ABX/Flg
P value and statistical significance
Test	Fisher's exact test
P value	0.02
P value summary	*
One- or two-sided	One-sided
Statistically significant (P < 0.05)?	Yes
ABX/PBS v. ABX/CpG
P value and statistical significance
Test	Fisher's exact test
P value	0.5292
P value summary	ns
One- or two-sided	One-sided
Statistically significant (P < 0.05)?	No
