# Supplementary material for: Homeostatic interferon-lambda response to bacterial microbiota stimulates preemptive antiviral defense within discrete pockets of intestinal epithelium
Source: eLife. 2022 Feb 9;11:e74072. doi: 10.7554/eLife.74072 (PMC8853662; doi:10.7554/eLife.74072)
Supplement: Figure 8—source data 1. [file elife-74072-fig8-data1.xlsx]

## Sheet: Figure 8H
Figure 8H - Source Data
Description: Area of Ifit1 fluorescence as a percentage of the total area of the tissue section
	Ifnlr1flox/flox												Ifnlr1ΔIEC
H2O/PBS	4.23	2.86	2.57	4.08136	2.64348	1.82067	2.24127						0.46	0.89	0.5	0.4
H2O/LPS	10.03	1.35	2.55285	2.17946	5.48924	1.77583							0.39	1.18
ABX/PBS	1.17	1.1	1.36	1.16	1.27507	1.27646	0.941092						0.24	0.29	0.31	1.55	0.27
ABX/LPS	1.9	0.06	2.05	0.45	0.9	3.55	1.21	1.23993	1.59535	1.19039	0.608256		0.32	0.25	0.17	0.08	0.4
ABX/FT	3.37	0.96	1.58	2.16	1.08586	1.2187	1.87209
Statistical Test performed on Ifnlr1 flox/flox
Dunn's multiple comparisons test	Mean rank diff.	Significant?	Summary	Adjusted P Value
ABX PBS vs. H2O PBS	-20.75	Yes	**	0.0038
ABX PBS vs. H2O LPS	-19.45	Yes	*	0.0111
ABX PBS vs. ABX LPS	-2.375	No	ns	>0.9999
ABX PBS vs. ABX FT	-6.375	No	ns	>0.9999

## Sheet: Figure 8I-J
Figure 8I-J - Source Data
Description: Number of Ifit1 + mice (falling above highest Ifnlr1 ΔIEC mouse) and number of Ifit1 - mice (falling below highest Ifnlr1 ΔIEC mouse)
	Ifit1 +	Ifit1 -
H2O/PBS	8	0
H2O/LPS	6	1
ABX/PBS	0	8
ABX/LPS	4	8
ABX/FT	4	4
Statistical Tests
ABX/PBS v. ABX/LPS
P value and statistical significance
Test	Fisher's exact test
P value	0.1022
P value summary	ns
One- or two-sided	One-sided
Statistically significant (P < 0.05)?	No
Effect size	Value	95% CI
Attributable risk (P1 - P2)	0.3333	0.02082 to 0.7921
NNT (reciprocal of attrib. risk)	3	1.262 to 48.03
ABX/PBS v. ABX/FT
P value and statistical significance
Test	Fisher's exact test
P value	0.0385
P value summary	*
One- or two-sided	One-sided
Statistically significant (P < 0.05)?	Yes
Effect size	Value	95% CI
Attributable risk (P1 - P2)	0.5	0.1743 to 1.017
NNT (reciprocal of attrib. risk)	2	0.9828 to 5.737
ABX/PBS v. H2O/PBS
P value and statistical significance
Test	Fisher's exact test
P value	<0.0001
P value summary	****
One- or two-sided	One-sided
Statistically significant (P < 0.05)?	Yes
Effect size	Value	95% CI
Attributable risk (P1 - P2)	1	0.4311 to 1.016
NNT (reciprocal of attrib. risk)	1	0.9839 to 2.320
ABX/PBS v. H2O/LPS
P value and statistical significance
Test	Fisher's exact test
P value	0.0014
P value summary	**
One- or two-sided	One-sided
Statistically significant (P < 0.05)?	Yes
Effect size	Value	95% CI
Attributable risk (P1 - P2)	0.8571	0.2631 to 0.9930
NNT (reciprocal of attrib. risk)	1.167	1.007 to 3.801

## Sheet: Figure 8K
Figure 8K - Source Data
Description: Log10 16S gene copies in stool normalized to ng of input
H2O/PBS	H2O/LPS	ABX/PBS	ABX/LPS	ABX/FT
5.0978	3.58347	1.87949	0.785506	4.58409
5.0269	4.53806	0.35954	0.427505	5.231
4.58542	4.10995	0.358194	0.275395	5.18526
5.15429	3.94358		-0.565553
Statistical Tests
Dunnett's multiple comparisons test	Mean Diff.	95.00% CI of diff.	Below threshold?	Summary	Adjusted P Value
H2O PBS vs. H2O LPS	0.9223	-0.09432 to 1.939	No	ns	0.0797
H2O PBS vs. ABX PBS	4.1	3.002 to 5.198	Yes	****	<0.0001
H2O PBS vs. ABX LPS	4.735	3.719 to 5.752	Yes	****	<0.0001
H2O PBS vs. ABX FT	-0.03401	-1.132 to 1.064	No	ns	0.9999
