# Supplementary material for: Homeostatic interferon-lambda response to bacterial microbiota stimulates preemptive antiviral defense within discrete pockets of intestinal epithelium
Source: eLife. 2022 Feb 9;11:e74072. doi: 10.7554/eLife.74072 (PMC8853662; doi:10.7554/eLife.74072)
Supplement: Figure 9—figure supplement 1—source data 1. [file elife-74072-fig9-figsupp1-data1.xlsx]

## Sheet: Figure 9 - Figure Supplement 1A
Figure 9 - Figure Supplement 1A - Source Data
Description: mRV genomes in stripped intestinal epithelium normalized to Rps29
Ifnlr1flox/flox	Ifnlr1ΔIEC
-1.38082	-1.66383
-1.37032	-0.339194
-1.25737	-0.2163
-2.09645	-0.865457
-1.52112	-0.282537
-2.12507	-1.68017
-2.12507	-1.21769
-2.12507	-0.68241
-0.489905	-1.50869
-1.5298	-1.15616
-2.12507	-2.12507
-0.443708	-0.920772
-0.655582	-0.507978
-0.984411	-2.12507
-1.9474	-2.12507
Unpaired t test
P value	0.1931
P value summary	ns
Significantly different (P < 0.05)?	No
One- or two-tailed P value?	Two-tailed
t, df	t=1.334, df=28

## Sheet: Figure 9 - Figure Supplement 1E
Figure 9 - Figure Supplement 1E - Source Data
Description: mRV antigen-positive cells as a percent of live IECs (EpCAM+/CD45-) from stripped epithelium
Ifnlr1flox/flox	Ifnlr1ΔIEC
0.12	0.27
0.1	0.52
0.14	1.48
0.28	0.79
0.2	1.45
0.1	0.1
0.32	0.15
0.3	0.43
1.14	0.7
0.1	0.15
0.16	0.22
0.47	0.62
0.34	0.8
0.1	0.74
	0.32
Mann Whitney test
P value	0.0181
Exact or approximate P value?	Exact
P value summary	*
Significantly different (P < 0.05)?	Yes
One- or two-tailed P value?	Two-tailed
Sum of ranks in column A,B	156.5 , 278.5
Mann-Whitney U	51.5

## Sheet: Figure 9 - Figure Supplement 1F
Figure 9 - Figure Supplement 1F - Source Data
Description: MFI of mRV antigen in infected cells normalized to uninfected cells
Ifnlr1flox/flox	Ifnlr1ΔIEC
7.66546	4.64583
6.12807	6.73279
4.90859	4.81651
4.37482	4.2894
3.75972	5.82546
3.91409	6.72696
6.98724	7.13694
5.67251	3.72813
6.64866	2.72252
9.34736	5.27133
	7.07158
	9.13146
	11.3113
	5.99784
Unpaired t test
P value	0.8524
P value summary	ns
Significantly different (P < 0.05)?	No
One- or two-tailed P value?	Two-tailed
t, df	t=0.1882, df=22

## Sheet: Figure 9 - Figure Supplement 1G
Figure 9 - Figure Supplement 1G - Source Data
Description: MFI values from S11F and %mRV values from S11E plotted in a correlation plot
Ifnlr1flox/flox			Ifnlr1ΔIEC
norm. MFI	% mRV+		norm. MFI	% mRV+
7.66546	0.12		4.64583	0.27
5.01954	0.07		6.73279	0.52
6.12807	0.14		4.81651	1.48
4.90859	0.28		4.2894	0.79
4.37482	0.2		5.82546	1.45
4.47135	0.025		5.98576	0.084
3.75972	0.32		6.72696	0.15
3.91409	0.3		7.13694	0.43
6.98724	1.14		3.72813	0.7
10.7003	0.044		2.72252	0.15
5.67251	0.16		5.27133	0.22
6.64866	0.47		7.07158	0.62
9.34736	0.34		9.13146	0.8
5.2554	0.053		11.3113	0.74
			5.99784	0.32
Linear best-fit values
Slope	0.01665
Y-intercept	0.3259
X-intercept	-19.58
1/slope	60.08
Std. Error
Slope	0.03708
Y-intercept	0.2375
95% Confidence Intervals
Slope	-0.05944 to 0.09273
Y-intercept	-0.1614 to 0.8133
X-intercept	-infinity to 1.848
Goodness of Fit
R squared	0.007408
Sy.x	0.4039
Is slope significantly non-zero?
F	0.2015
DFn, DFd	1, 27
P value	0.6571
Deviation from zero?	Not Significant
Equation	Y = 0.01665*X + 0.3259
