# Supplementary material for: Homeostatic interferon-lambda response to bacterial microbiota stimulates preemptive antiviral defense within discrete pockets of intestinal epithelium
Source: eLife. 2022 Feb 9;11:e74072. doi: 10.7554/eLife.74072 (PMC8853662; doi:10.7554/eLife.74072)
Supplement: Figure 9—figure supplement 2—source data 1. [file elife-74072-fig9-figsupp2-data1.xlsx]

## Sheet: Figure 9 - Figure Supplement 2D
Figure 9 - Figure Supplement 2D - Source Data
Description: Percentage of mRV-infected cells that are Ifit1-positive and Ifit1-negative at given times post-inoculation with mRV.
Hour	Total mRV+ particles	Ifit1+	Ifit1-	% Ifit1+	% Ifit1-
12hr	3	1	2	33.3333	66.6667
12hr	1	0	1	0	100
12hr	3	1	2	33.3333	66.6667
12hr	12	3	9	25	75
12hr	8	2	6	25	75
12hr	25	11	14	44	56
12hr	12	4	8	33.3333	66.6667
12hr	1	0	1	0	100
12hr	5	2	3	40	60
24hr	0	0	0	0	100
24hr	47	21	26	44.6809	55.3191
24hr	469	210	259	44.7761	55.2239
24hr	35	15	20	42.8571	57.1429
24hr	11	4	7	36.3636	63.6364
24hr	28	9	19	32.1429	67.8571
24hr	3004	1884	1120	62.7164	37.2836
24hr	4	1	3	25	75
24hr	60	7	53	11.6667	88.3333
24hr	1244	504	740	40.5145	59.4855
96hr	2185	1269	916	58.0778	41.9222
96hr	1324	774	550	58.4592	41.5408
96hr	1208	614	594	50.8278	49.1722
96hr	1690	1152	538	68.1657	31.8343
96hr	716	472	244	65.9218	34.0782
96hr	1156	837	319	72.4048	27.5952
96hr	938	612	326	65.2452	34.7548
