# Supplementary material for: Homeostatic interferon-lambda response to bacterial microbiota stimulates preemptive antiviral defense within discrete pockets of intestinal epithelium
Source: eLife. 2022 Feb 9;11:e74072. doi: 10.7554/eLife.74072 (PMC8853662; doi:10.7554/eLife.74072)
Supplement: Figure 9—figure supplement 3—source data 1. [file elife-74072-fig9-figsupp3-data1.xlsx]

## Sheet: Figure 9 - Figure Supplement 3A
Figure 9 - Figure Supplement 3A - Source Data
Description: Area of Ifit1 fluorescence as a percentage of the total area of the tissue section at given times post-inoculation with mRV. Boundaries represent prior min and mix ranges of Ifit1 area in WT mice.
Hr Post-incoluation	12	24	96
	0.428843	0.69671	6.68006
	1.43211	0.689779	8.08032
	0.565447	1.32051	3.70146
	0.213412	1.26283	9.86612
	0.688253	1.18836	13.07
	1.24707	1.3017	20.8604
	0.687615	4.67106	8.55609
	0.377743	0.86961
	0.756455	0.581994
		2.86692
Min: 0.35
Max: 4.23
Tukey's multiple comparisons test	Mean Diff.	95.00% CI of diff.	Below threshold?	Summary	Adjusted P Value
12hr vs. 24hr	-0.8342	-4.225 to 2.556	No	ns	0.8128
12hr vs. 96hr	-9.406	-13.12 to -5.687	Yes	****	<0.0001
24hr vs. 96hr	-8.571	-12.21 to -4.935	Yes	****	<0.0001

## Sheet: Figure 9 - Figure Supplement 3B
Figure 9 - Figure Supplement 3B - Source Data
Description: Log10 mRV genomes in stripped intestinal epithelium normalized to Rps29. Note: 24hr data is duplicated from the Ifnlr1 flox/flox group in Figure 9.
Hr Post-incoluation	24	96
	-0.179811	0.795542
	-1.96718	-0.131777
	0.30416	-0.167334
	-1.71248	0.406547
	-0.99559	-0.490155
	-1.1695	-0.221986
	-2.51084	0.00602423
	-2.76
	-1.66357
	-2.76
Mann Whitney test
P value	0.0046
Exact or approximate P value?	Exact
P value summary	**
Significantly different (P < 0.05)?	Yes
One- or two-tailed P value?	Two-tailed
Sum of ranks in column A,B	62 , 91
Mann-Whitney U	7

## Sheet: Figure 9 - Figure Supplement 3C
Figure 9 - Figure Supplement 3C - Source Data
Description: mRV antigen-positive cells as a percent of live IECs (EpCAM+/CD45-) from stripped epithelium. Note: 24hr data is duplicated from the Ifnlr1 flox/flox group in Figure 9.
Hr Post-incoluation	24	96
	3.5	7.22
	0.12	1.77
	2.52	1.32
	0.081	5.25
	0.2	3.5
	0.095	2.39
	0.031	2.98
	0.019
	0.031
	0.00522
Mann Whitney test
P value	0.0211
Exact or approximate P value?	Exact
P value summary	*
Significantly different (P < 0.05)?	Yes
One- or two-tailed P value?	Two-tailed
Sum of ranks in column A,B	140.5 , 112.5
Mann-Whitney U	20.5
