# Supplementary material for: Homeostatic interferon-lambda response to bacterial microbiota stimulates preemptive antiviral defense within discrete pockets of intestinal epithelium
Source: eLife. 2022 Feb 9;11:e74072. doi: 10.7554/eLife.74072 (PMC8853662; doi:10.7554/eLife.74072)
Supplement: Figure 9—source data 1. [file elife-74072-fig9-data1.xlsx]

## Sheet: Figure 9A
Figure 9A - Source Data
Description: mRV genomes per stool pellet in Ifnlr1 flox/flox mice and Ifnlr1ΔIEC mice across a timecourse
	Ifnlr1flox/flox	Ifnlr1flox/flox	Ifnlr1flox/flox	Ifnlr1flox/flox	Ifnlr1flox/flox	Ifnlr1flox/flox	Ifnlr1flox/flox	Ifnlr1flox/flox		Ifnlr1ΔIEC	Ifnlr1ΔIEC	Ifnlr1ΔIEC	Ifnlr1ΔIEC	Ifnlr1ΔIEC	Ifnlr1ΔIEC	Ifnlr1ΔIEC	Ifnlr1ΔIEC
Day 1	2.80348	2.20412	2.20412	2.20412	2.20412	2.20412	2.20412	2.20412		2.20412	2.20412	3.79997	2.20412	2.20412	2.20412	2.20412	2.20412
Day 2	4.61578	2.53124	3.29003	5.51533	3.13256	3.57164	4.6039	3.30767		3.20728	6.23644	6.26909	5.57755	5.15028	5.4435	4.5176	4.45159
Day 3	5.84308	5.03851	5.7832	5.76757	5.65584	5.17834	6.20553	5.62184		5.24239	6.19417	5.9185	5.24427	5.89203	5.87032	5.53832	6.16235
Day 4	5.43566	5.88862	5.04128	5.99179	5.85174	5.03873	5.0379	5.96307		6.03536	5.86382	5.7733	5.46045	6.23216	5.93192	5.54682	5.74841
Day 5	5.53211	5.40922	5.73034	6.01576	6.16794	5.64643	5.37754	5.86572		6.22575	6.12107	5.80692	5.90272	6.56434	6.22254	5.8488	5.76409
Day 6	4.50208	5.71548	4.61541	4.18354	5.64583	4.77817	3.15103	5.55845		5.84575	5.37412	4.0626	4.43943	6.2916	4.28043	4.8295	6.01521
Day 7	2.20412	4.44416	2.97473	2.88651	4.22608	2.20412	2.87044	3.40071		3.85949	4.08853	3.10415	2.83336	4.4149	3.30956	3.35392	3.99
Statistical Test
Šídák's multiple comparisons test	Mean Diff.	95.00% CI of diff.	Below threshold?	Summary	Adjusted P Value
Ifnlr1ΔIEC - Ifnlr1flox/flox
1	0.1246	-0.7403 to 0.9894	No	ns	0.9997
2	1.286	0.4208 to 2.150	Yes	***	0.0007
3	0.1211	-0.7438 to 0.9859	No	ns	0.9998
4	0.2929	-0.5719 to 1.158	No	ns	0.9539
5	0.3389	-0.5259 to 1.204	No	ns	0.905
6	0.3736	-0.4913 to 1.238	No	ns	0.8528
7	0.4679	-0.3970 to 1.333	No	ns	0.6562

## Sheet: Figure 9B
Figure 9B - Source Data
Description: mRV genomes in stripped intestinal epithelium normalized to Rps29
Ifnlr1flox/flox	Ifnlr1ΔIEC
-0.179811	0.21083
-1.96718	0.708412
0.30416	0.00510086
-1.71248	-2.76
-0.99559	-2.76
-1.1695	0.255028
-2.51084	0.916347
-2.76	0.936916
-1.66357	-0.55666
-2.76	0.061732
Statistical Test
Mann Whitney test
P value	0.0488
Exact or approximate P value?	Exact
P value summary	*
Significantly different (P < 0.05)?	Yes
One- or two-tailed P value?	Two-tailed
Sum of ranks in column A,B	79 , 131
Mann-Whitney U	24

## Sheet: Figure 9F
Figure 9F - Source Data
Description: mRV antigen-positive cells as a percent of live IECs (EpCAM+/CD45-) from stripped epithelium
Ifnlr1flox/flox	Ifnlr1ΔIEC
0.37	0.39
4.41	2.24
1.85	2.57
1.42	10.5
4.59	4.59
3.5	5.83
0.12	5.31
2.52	4.28
0.1	0.1
0.2	0.1
0.1	1.75
0.1	2.35
0.1	3.51
0.1	0.54
0.1	1.35
Statistical Test
Mann Whitney test
P value	0.036
Exact or approximate P value?	Exact
P value summary	*
Significantly different (P < 0.05)?	Yes
One- or two-tailed P value?	Two-tailed
Sum of ranks in column A,B	182.5 , 282.5
Mann-Whitney U	62.5

## Sheet: Figure 9G
Figure 9G - Source Data
Description: MFI of mRV antigen in infected cells normalized to uninfected cells
Ifnlr1flox/flox	Ifnlr1ΔIEC
42.0529	60.0002
29.2186	47.8178
49.573	43.6868
51.046	13.2983
23.7862	19.9436
26.7531	19.9433
5.49215	19.6481
22.8325	21.532
17.017
Statistical Test
Unpaired t test
P value	0.2517
P value summary	ns
Significantly different (P < 0.05)?	No
One- or two-tailed P value?	Two-tailed
t, df	t=1.180, df=20
How big is the difference?
Mean of column A	29.75
Mean of column B	39.06
Difference between means (B - A) ± SEM	9.309 ± 7.887
95% confidence interval	-7.142 to 25.76
R squared (eta squared)	0.06513

## Sheet: Figure 9H
Figure 9H - Source Data
Description: MFI values from 9G and %mRV values from 9H plotted in a correlation plot
Ifnlr1flox/flox			Ifnlr1ΔIEC
norm. MFI	% mRV+		norm. MFI	% mRV+
42.0529	0.37		60.0002	0.39
29.2186	4.41		47.8178	2.24
49.573	1.85		43.6868	2.57
51.046	1.42		13.2983	10.5
23.7862	4.59		19.9436	4.59
26.7531	3.5		19.9433	5.83
5.49215	0.12		19.6481	5.31
22.8325	2.52		21.532	4.28
11.9975	0.081		7.8383	0.02
17.017	0.2		8.23852	0.00882
11.7569	0.095		58.9524	1.75
7.65397	0.031		48.8516	2.35
8.21547	0.019		47.5669	3.51
14.9111	0.031		28.8735	0.54
11.9613	0.00522		77.6891	1.35
Best-fit values
Slope	0.002218
Y-intercept	2.086
X-intercept	-940.3
1/slope	450.8
Std. Error
Slope	0.02393
Y-intercept	0.8211
95% Confidence Intervals
Slope	-0.04680 to 0.05123
Y-intercept	0.4041 to 3.768
X-intercept	-infinity to -9.042
Goodness of Fit
R squared	0.0003069
Sy.x	2.484
Is slope significantly non-zero?
F	0.008595
DFn, DFd	1, 28
P value	0.9268
Deviation from zero?	Not Significant
Equation	Y = 0.002218*X + 2.086

## Sheet: Figure 9J
Figure 9J - Source Data
Description: Percentage of mRV-infected cells that are Ifit1-positive at given times post-inoculation with mRV.
Hour p.i.	12	24	96
	33.3333	0	58.0778
	0	44.6809	58.4592
	33.3333	44.7761	50.8278
	25	42.8571	68.1657
	25	36.3636	65.9218
	44	32.1429	72.4048
	33.3333	62.7164	65.2452
	0	25
	40	11.6667
		40.5145
Dunn's multiple comparisons test	Mean rank diff.	Significant?	Summary	Adjusted P Value
12hr vs. 24hr	-3.467	No	ns	0.9687	A-B
12hr vs. 96hr	-14.24	Yes	***	0.0006	A-C
24hr vs. 96hr	-10.77	Yes	*	0.0126	B-C
